# Supplementary material
Source: PubMed Central journal article supplement (PMC11075576)
Supplement: NIHMS1983678-supplement-protocol.pdf [file NIHMS1983678-supplement-protocol.pdf]

# Protocol

Protocol for: Prekker ME, Driver BE, Trent SA, et al. Video versus direct laryngoscopy for tracheal intubation of critically ill adults. *N Engl J Med* 2023;389:418-29. DOI: 10.1056/NEJMoa2301601

This trial protocol has been provided by the authors to give readers additional information about the work.

**Supplementary Appendix:  
Study Protocol and Statistical Analysis Plan**

**Trial:** DirEct Versus Vlideo LaryngosCopE (DEVICE) trial

**Manuscript:** Video versus direct laryngoscopy for tracheal intubation of critically ill adults

**ClinicalTrials.gov:** NCT05239195

**Authors:** Matthew E. Prekker; Brian E. Driver; Stacy A. Trent; Daniel Resnick-Ault; Kevin P. Seitz; Derek W. Russell; John P. Gaillard; Andrew J. Latimer; Shekhar A. Ghamande; Kevin W. Gibbs; Derek J. Vonderhaar; Micah R. Whitson; Christopher R. Barnes; Jeremy P. Walco; Ivor S. Douglas; Vijay Krishnamoorthy; Alon Dagan,; Jill J. Bastman; Bradley D. Lloyd; Sheetal Gandotra; Jordan Kugler Goranson; Steven H. Mitchell; Heath D. White; Jessica A. Palakshappa; Alyssa Espinera; David B. Page; Aaron Joffe; Sydney J. Hansen; Christopher G. Hughes; Tobias George,; J. Taylor Herbert; Nathan I. Shapiro; Steven G. Schauer; Brit J. Long; Brant Imhoff; Li Wang; Jillian P. Rhoads; Kelsey N. Womack; David R. Janz; Wesley H. Self; Todd W. Rice; Adit A. Ginde; Jonathan D. Casey; Matthew W. Semler for the DEVICE Investigators and the Pragmatic Critical Care Research Group

**This Supplementary Appendix contains the following items:**

- 1) Protocol (only one version) [dated 9/30/2021]
- 2) Original SAP [posted 11/8/2022]
- 3) Final SAP [submitted 10/10/23; published 1/13/2023]
- 4) Summary of changes to Statistical Analysis Plan

## Clinical Trial Protocol

|                                         |                                                                                                                                                                                                                                                                                                                                                                                                                   |
|-----------------------------------------|-------------------------------------------------------------------------------------------------------------------------------------------------------------------------------------------------------------------------------------------------------------------------------------------------------------------------------------------------------------------------------------------------------------------|
| <b>Title</b>                            | <u>Dir</u> Ect Versus <u>V</u> ideo Laryngos <u>Cop</u> E Trial (DEVICE)                                                                                                                                                                                                                                                                                                                                          |
| <b>Acronym</b>                          | DEVICE                                                                                                                                                                                                                                                                                                                                                                                                            |
| <b>Version</b>                          | Version 1.0                                                                                                                                                                                                                                                                                                                                                                                                       |
| <b>Date</b>                             | September 30, 2021                                                                                                                                                                                                                                                                                                                                                                                                |
| <b>Protocol Chairs</b>                  | <p>Matthew E. Prekker, MD, MPH<br/>Hennepin County Medical Center and University of Minnesota Medical School</p> <p>Brian E. Driver, MD<br/>Hennepin County Medical Center and University of Minnesota Medical School</p> <p>Stacy A. Trent, MD, MPH<br/>Denver Health Medical Center and University of Colorado School of Medicine</p> <p>Matthew W. Semler MD, MSc<br/>Vanderbilt University Medical Center</p> |
| <b>Coordinating Center</b>              | Vanderbilt University Medical Center<br>Director: Jonathan D. Casey, MD, MSc                                                                                                                                                                                                                                                                                                                                      |
| <b>Network</b>                          | Pragmatic Critical Care Research Group (PCCRG)<br>Steering Committee Chair: Matthew W. Semler MD, MSc                                                                                                                                                                                                                                                                                                             |
| <b>Military Principal Investigators</b> | <p>Maj Brit J Long, MD<br/>US Air Force 59MDW</p> <p>MAJ. Steven G. Schauer, MD, MS<br/>US Army Institute of Surgical Research and US Air Force 59MDW</p>                                                                                                                                                                                                                                                         |
| <b>Civilian Principal Investigators</b> | <p>Adit A. Ginde, MD, MPH<br/>University of Colorado School of Medicine</p> <p>Matthew W. Semler MD, MSc<br/>Vanderbilt University Medical Center</p>                                                                                                                                                                                                                                                             |
| <b>Sponsor</b>                          | Department of Defense                                                                                                                                                                                                                                                                                                                                                                                             |

## Table of Contents

|                                                                            |    |
|----------------------------------------------------------------------------|----|
| Table of Contents                                                          | 2  |
| Trial Summary                                                              | 4  |
| 1 Background                                                               | 7  |
| 2 Aims, Hypotheses, and Study Description                                  | 8  |
| 2.1 Study Aims                                                             | 8  |
| 2.2 Study Hypotheses                                                       | 8  |
| 2.3 Study Description                                                      | 9  |
| 3 Inclusion and Exclusion Criteria                                         | 9  |
| 3.1 Inclusion Criteria                                                     | 9  |
| 3.2 Exclusion Criteria                                                     | 9  |
| 4 Consent                                                                  | 9  |
| 4.1 Information for Patients and Families                                  | 11 |
| 5 Study Sites, Enrollment, and Randomization                               | 11 |
| 5.1 Study Enrollment Locations                                             | 11 |
| 5.2 Study Enrollment Location                                              | 11 |
| 5.3 Enrollment and Randomization                                           | 11 |
| 5.3.1 Pre-Procedural Time-Out to Prevent Enrollment of Ineligible Patients | 12 |
| 5.3.2 Monitoring and Reporting of Eligibility of Enrolled Patients         | 12 |
| 5.3.3 Handling of Patients Found to Be Prisoners after Enrollment          | 12 |
| 6 Study Procedures                                                         | 13 |
| 6.1 Video Laryngoscope Group                                               | 13 |
| 6.2 Direct Laryngoscope Group                                              | 13 |
| 7 Data Collection and Outcome Measures                                     | 13 |
| 7.1 Data Collection                                                        | 13 |
| 7.2 Recorded Study Outcomes                                                | 16 |
| 7.2.1 Primary Outcome                                                      | 16 |
| 7.2.2 Secondary Outcome                                                    | 16 |
| 7.2.3 Exploratory Outcomes                                                 | 16 |
| 8 Risks and Benefits                                                       | 17 |
| 8.1 Risks of Tracheal Intubation in the ED or ICU                          | 17 |
| 8.2 Potential Risks of Participation in the DEVICE Trial                   | 17 |
| 8.3 Potential Benefits of Participation in the DEVICE Trial                | 17 |
| 8.4 Minimization of Risk                                                   | 18 |

|       |                                                                                 |    |
|-------|---------------------------------------------------------------------------------|----|
| 9     | Statistical Considerations                                                      | 18 |
| 9.1   | General Considerations                                                          | 18 |
| 9.2   | Sample Size Estimation                                                          | 18 |
| 9.3   | Analysis Populations                                                            | 19 |
| 9.4   | Statistical Analysis                                                            | 19 |
| 9.4.1 | Primary Analysis                                                                | 19 |
| 9.4.2 | Secondary Analyses                                                              | 19 |
| 9.4.4 | Handling of Missing Data                                                        | 20 |
| 9.4.5 | Interim Analysis                                                                | 20 |
| 10    | Privacy and Confidentiality                                                     | 21 |
| 11    | Follow-up and Record Retention                                                  | 21 |
| 12    | Safety Monitoring and Adverse Events                                            | 21 |
| 12.1  | Adverse Event Definitions                                                       | 22 |
| 12.2  | Monitoring for Adverse Events                                                   | 22 |
| 12.3  | Recording and Reporting Adverse Events                                          | 23 |
| 12.4  | Clinical Outcomes that may be Exempt from Adverse Event Recording and Reporting | 24 |
| 12.5  | Unanticipated Problems involving Risks to Subjects or Others                    | 25 |
| 13    | Data and Safety Monitoring Board (DSMB)                                         | 25 |
| 14    | References                                                                      | 26 |

## Trial Summary

|                           |                                                                                                                                                                                                                                                                                                                                                                                                                                                                                                                                                                                                                                                                                                                                                                                                                                                                                                                                                                                                                                                                                                                                                                                                                                                                                                                                                                                                                                                     |
|---------------------------|-----------------------------------------------------------------------------------------------------------------------------------------------------------------------------------------------------------------------------------------------------------------------------------------------------------------------------------------------------------------------------------------------------------------------------------------------------------------------------------------------------------------------------------------------------------------------------------------------------------------------------------------------------------------------------------------------------------------------------------------------------------------------------------------------------------------------------------------------------------------------------------------------------------------------------------------------------------------------------------------------------------------------------------------------------------------------------------------------------------------------------------------------------------------------------------------------------------------------------------------------------------------------------------------------------------------------------------------------------------------------------------------------------------------------------------------------------|
| <b>Title</b>              | DirEct Versus Video LaryngosCope Trial (DEVICE)                                                                                                                                                                                                                                                                                                                                                                                                                                                                                                                                                                                                                                                                                                                                                                                                                                                                                                                                                                                                                                                                                                                                                                                                                                                                                                                                                                                                     |
| <b>Background</b>         | <p>Clinicians perform rapid sequence induction, laryngoscopy, and tracheal intubation for more than 5 million critically ill adults as a part of clinical care each year in the United States. Failure to intubate the trachea on the first attempt occurs in more than 10% of all tracheal intubation procedures performed in the emergency department (ED) and intensive care unit (ICU). Improving clinicians rate of intubation on the first attempt could reduce the risk of serious procedural complications.</p> <p>In current clinical practice, two classes of laryngoscopes are commonly used to help clinicians view the larynx while intubating the trachea: a video laryngoscope (equipped with a camera and a video screen) and a direct laryngoscope (not equipped with a camera or video screen). For every laryngoscopy and intubation procedure performed in current clinical practice, clinicians use either a video or a direct laryngoscope. Prior research has shown that use of a video laryngoscope improves the operator’s view of the larynx compared to a direct laryngoscope. Whether use of a video laryngoscope increases the likelihood of successful intubation on the first attempt remains uncertain. A better understanding of the comparative effectiveness of these two common, standard-of-care approaches to laryngoscopy and intubation could improve the care clinicians deliver and patient outcomes.</p> |
| <b>Study Design</b>       | Multi-center, parallel-group, non-blinded, randomized clinical trial                                                                                                                                                                                                                                                                                                                                                                                                                                                                                                                                                                                                                                                                                                                                                                                                                                                                                                                                                                                                                                                                                                                                                                                                                                                                                                                                                                                |
| <b>Trial Groups</b>       | <ol style="list-style-type: none"> <li>1. Video laryngoscope group</li> <li>2. Direct laryngoscope group</li> </ol>                                                                                                                                                                                                                                                                                                                                                                                                                                                                                                                                                                                                                                                                                                                                                                                                                                                                                                                                                                                                                                                                                                                                                                                                                                                                                                                                 |
| <b>Inclusion Criteria</b> | <ol style="list-style-type: none"> <li>1. Patient is located in a participating unit</li> <li>2. Planned procedure is orotracheal intubation using a laryngoscope</li> <li>3. Planned operator is a clinician expected to routinely perform tracheal intubation in the participating unit</li> </ol>                                                                                                                                                                                                                                                                                                                                                                                                                                                                                                                                                                                                                                                                                                                                                                                                                                                                                                                                                                                                                                                                                                                                                |
| <b>Exclusion Criteria</b> | <ol style="list-style-type: none"> <li>1. Patient is known to be less than 18 years old</li> <li>2. Patient is known to be pregnant</li> <li>3. Patient is known to be a prisoner</li> <li>4. Immediate need for tracheal intubation precludes safe performance of study procedures</li> <li>5. Operator has determined that use of a video laryngoscope or use of a direct laryngoscope is required or contraindicated for the optimal care of the patient</li> </ol>                                                                                                                                                                                                                                                                                                                                                                                                                                                                                                                                                                                                                                                                                                                                                                                                                                                                                                                                                                              |
| <b>Risks</b>              | Participation in this study involves minimal incremental risk because:                                                                                                                                                                                                                                                                                                                                                                                                                                                                                                                                                                                                                                                                                                                                                                                                                                                                                                                                                                                                                                                                                                                                                                                                                                                                                                                                                                              |

|                             |                                                                                                                                                                                                                                                                                                                                                                                                                                                                                                                                                                                                                                                                  |
|-----------------------------|------------------------------------------------------------------------------------------------------------------------------------------------------------------------------------------------------------------------------------------------------------------------------------------------------------------------------------------------------------------------------------------------------------------------------------------------------------------------------------------------------------------------------------------------------------------------------------------------------------------------------------------------------------------|
|                             | <ul style="list-style-type: none"> <li>• All patients eligible for the study are already undergoing tracheal intubation with a video laryngoscope or a direct laryngoscope as part of their clinical care</li> <li>• Use of a video laryngoscope and use of a direct laryngoscope are the most common approaches to tracheal intubation of critically ill adults in clinical care</li> <li>• No benefits or risks are currently known to differ between the two approaches</li> <li>• If clinicians determine either approach to be required or contraindicated for the optimal care of an individual patient, the patient is excluded from the study</li> </ul> |
| <b>Benefits</b>             | The benefits of the DEVICE trial are largely the indirect benefits to future patients that will result by a better understanding of whether use of video laryngoscope or use of a direct laryngoscope is found to prevent complications.                                                                                                                                                                                                                                                                                                                                                                                                                         |
| <b>Consent</b>              | The trial will be conducted with waiver of informed consent because: <ul style="list-style-type: none"> <li>• Participation in the study involves minimal incremental risk</li> <li>• Obtaining informed consent prior to emergency tracheal intubation of critically ill adults is impracticable</li> </ul>                                                                                                                                                                                                                                                                                                                                                     |
| <b>Randomization</b>        | Using opaque envelopes available in participating units, participants will be randomized 1:1 to either use of a video laryngoscope or use of a direct laryngoscope on the first laryngoscopy attempt. Randomization will be completed in permuted blocks of variable size and stratified by site.                                                                                                                                                                                                                                                                                                                                                                |
| <b>Primary Outcome</b>      | <u>Successful intubation on the first attempt</u> , defined as the placement of an endotracheal tube in the trachea with a single insertion of a laryngoscope blade into the mouth and EITHER a single insertion of an endotracheal tube into the mouth OR a single insertion of a bougie into the mouth followed by a single insertion of an endotracheal tube over the bougie into the mouth.                                                                                                                                                                                                                                                                  |
| <b>Secondary Outcome</b>    | <u>Incidence of severe complications</u> , defined as the occurrence of one or more of the following between induction and 2 minutes after intubation: [1] severe hypoxemia (SpO2 <80%), [2] severe hypotension (systolic blood pressure <65 mm Hg or new or increased vasopressor administration), [3] cardiac arrest not resulting in death within 1 hour of induction, or [4] cardiac arrest resulting in death within 1 hour of induction.                                                                                                                                                                                                                   |
| <b>Exploratory Outcomes</b> | <u>Procedural</u> : <ul style="list-style-type: none"> <li>• Duration from laryngoscopy to tracheal intubation – defined as the interval (in seconds) between insertion of the laryngoscope into the mouth on the first laryngoscopy attempt and final placement of an endotracheal tube or tracheostomy tube in the trachea.</li> <li>• Number of laryngoscopy attempts</li> </ul>                                                                                                                                                                                                                                                                              |

|                          |                                                                                                                                                                                                                                                                                                                                                                                                                                                                                                                                                                                                                                                                             |
|--------------------------|-----------------------------------------------------------------------------------------------------------------------------------------------------------------------------------------------------------------------------------------------------------------------------------------------------------------------------------------------------------------------------------------------------------------------------------------------------------------------------------------------------------------------------------------------------------------------------------------------------------------------------------------------------------------------------|
|                          | <ul style="list-style-type: none"> <li>● Number of attempts to cannulate the trachea with a bougie</li> <li>● Number of attempts to cannulate the trachea with an endotracheal tube</li> <li>● Reason for failure to intubate on the first attempt</li> <li>● Operator-reported aspiration into the airway</li> </ul> <p><u>Safety:</u></p> <ul style="list-style-type: none"> <li>● Esophageal intubation</li> <li>● Injury to the teeth</li> </ul> <p><u>Clinical:</u></p> <ul style="list-style-type: none"> <li>● ICU-free days in the first 28 days</li> <li>● Ventilator free days in the first 28 days</li> <li>● 28-day, all-cause in-hospital mortality</li> </ul> |
| <b>Analysis</b>          | The primary analysis will be an intention-to-treat comparison of patients randomized to the video laryngoscope group versus patients randomized to the direct laryngoscope group with regard to the primary outcome of successful intubation on the first attempt. The difference in proportion and the associated 95% confidence interval will be presented. Between group differences will be examined using a Chi-square test.                                                                                                                                                                                                                                           |
| <b>Sample Size</b>       | 2,000 patients                                                                                                                                                                                                                                                                                                                                                                                                                                                                                                                                                                                                                                                              |
| <b>Expected Duration</b> | 18 months                                                                                                                                                                                                                                                                                                                                                                                                                                                                                                                                                                                                                                                                   |



## 1 Background

Clinicians frequently perform tracheal intubation of critically ill patients in the emergency department (ED) or intensive care unit (ICU). In 10-20% of emergency tracheal intubations, clinicians are unable to intubate the trachea on the first attempt, which increases the risk of peri-intubation complications.<sup>1-4</sup> Successful laryngoscopy and tracheal intubation requires using a laryngoscope to [1] visualize the larynx and vocal cords and [2] create a pathway through which an endotracheal tube can be advanced through the oropharynx and larynx and into the trachea.

In current clinical practice, two classes of laryngoscopes are commonly used by clinicians to view the larynx while intubating the trachea: a video laryngoscope (equipped with a camera and a video screen) and a direct laryngoscope (not equipped with a camera or video screen). Clinicians use either a video laryngoscope or a direct laryngoscope as standard of care for every laryngoscopy and intubation procedure performed in current clinical practice.

Direct Laryngoscope. The Macintosh direct laryngoscope (Fig. 1) consists of a battery-containing handle and a blade with a light source. The operator achieves a direct line of sight –from the operator’s eye through the mouth to the larynx and trachea – by using the laryngoscope blade to displace the tongue and elevate the epiglottis.<sup>5,6</sup>

Video Laryngoscope. Video laryngoscopes consist of a fiberoptic camera and light source near the tip of the laryngoscope blade, which transmits images to a video screen (Fig. 2). The position of the camera near the tip of the laryngoscope blade facilitates visualization of the larynx and trachea.

**Use of a video laryngoscope and use of a direct laryngoscope are both common, standard-of-care approaches the clinicians use to perform tracheal intubation in the ED and ICU in current clinical care.**

Currently, it is unknown whether use of a video laryngoscope or use of a direct laryngoscope has any effect on successful intubation on the first attempt or any other outcome. Some prior research has raised the hypothesis that using a video laryngoscope would increase clinicians’ rate of successful intubation on the first attempt by facilitating the view of the larynx.<sup>7</sup> Some prior research has raised the hypothesis that using a direct laryngoscope would increase clinicians’ rate of successful intubation on the first attempt by facilitating a clear pathway for placement of the tube through the mouth into the trachea.

To date, 8 small single-center randomized trials<sup>8-15</sup> and one 371-patient multicenter randomized clinical trial<sup>16</sup> have been conducted under waiver of or alteration of informed consent to compare use of a video vs a direct laryngoscope in the setting of emergency tracheal intubation in the ED or ICU. Two of these trials provide the most direct preliminary data for this proposal. The “Facilitating Endotracheal intubation by Laryngoscopy technique and apneic Oxygenation Within the ICU (FELLOW)” randomized clinical trial, conducted under waiver of informed consent, compared these two standard-of-

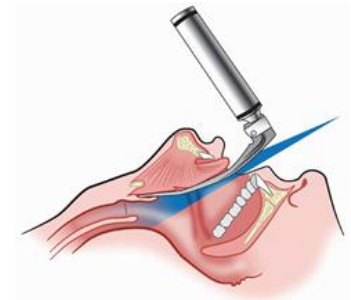

Figure 1. Macintosh direct laryngoscope creating a direct line-of-sight to the airway opening (from: Walls Manual of Emergency Airway Management, 5<sup>th</sup> ed. 2018).

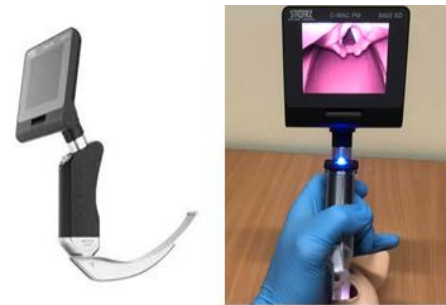

Figure 2. Example of a video laryngoscope with standard geometry blade (C-MAC with pocket monitor, Karl Storz Inc).

care approaches during 150 emergency tracheal intubations at Vanderbilt University Medical Center, finding no difference in the rate of successful intubation on the first attempt between use of a video and use of a direct laryngoscope.<sup>11</sup> The “McGrath Mac Videolaryngoscope Versus Macintosh Laryngoscope for Orotracheal Intubation in the Critical Care Unit (MACMAN)” randomized clinical trial among 371 critically ill adults found no difference between use of a video vs direct laryngoscope in the rate of successful intubation on the first attempt. However, a hypothesis-forming post-hoc exploratory analysis of peri-intubation complications suggested that use of a video laryngoscope may be associated with a higher rate of complications than direct laryngoscope (9.5% vs 2.8%, respectively,  $p=0.01$ ).<sup>16</sup> These trials were underpowered to rule out small but clinically significant differences in first pass success, and were limited to intubations performed by inexperienced trainees in one practice setting (intensive care units), but they demonstrated hypothesis-generating findings requiring validation in larger trials that reflect the full spectrum of settings, operator specialties, and operator experience levels in which emergency tracheal intubation is routinely performed.

Because of the imperative to optimize emergency tracheal intubation in clinical care, the common use of both video and direct laryngoscopes in current clinical practice, and the lack of definitive data from randomized trials to definitively inform whether use of a video laryngoscope or a direct laryngoscope effects the rate of successful intubation on the first attempt, examining whether one approach increases the odds of successful intubation on the first attempt represents an urgent research priority. To address this knowledge gap, we propose to conduct a large, multicenter, randomized clinical trial comparing use of a video laryngoscope versus use of a direct laryngoscope with regard to successful intubation on the first attempt among critically ill adults undergoing tracheal intubation in the ED or ICU.

## **2 Aims, Hypotheses, and Study Description**

### **2.1 Study Aims**

- Primary:
  - To compare the effect of use of a video laryngoscope versus a direct laryngoscope on successful intubation on the first attempt among critically ill adults undergoing tracheal intubation in the acute care setting.
- Secondary:
  - To compare the effect of use of a video laryngoscope versus a direct laryngoscope on severe complications among critically ill adults undergoing tracheal intubation in the acute care setting.

### **2.2 Study Hypotheses**

- Primary:
  - Among critically ill adults undergoing tracheal intubation, use of a video laryngoscope will increase the proportion of patients who experience successful intubation on the first attempt, compared with use of a direct laryngoscope.

- Secondary
  - Among critically ill adults undergoing tracheal intubation, use of a video laryngoscope will decrease the proportion of patient who experience a severe complication, compared with use of a direct laryngoscope.

### **2.3 Study Description**

To address these aims, we propose a multi-center, non-blinded, parallel-group, randomized clinical trial evaluating the effect of use of a video laryngoscope versus a direct laryngoscope on successful intubation on the first attempt among critically ill adults undergoing tracheal intubation. Patients located in participating EDs and ICUs who are determined by treating clinicians to require tracheal intubation and who meet eligibility criteria will be enrolled and randomly assigned to either use of a video laryngoscope or use of a direct laryngoscope. All other decisions regarding the intubation procedure will be at the discretion of the treating clinicians.

## **3 Inclusion and Exclusion Criteria**

### **3.1 Inclusion Criteria**

1. Patient is located in a participating unit.
2. Planned procedure is orotracheal intubation using a laryngoscope.
3. Planned operator is a clinician expected to routinely perform tracheal intubation in the participating unit.

### **3.2 Exclusion Criteria**

1. Patient is known to be less than 18 years old.
2. Patient is known to be pregnant.
3. Patient is known to be a prisoner.
4. Immediate need for tracheal intubation precludes safe performance of study procedures.
5. Operator has determined that use of a video laryngoscope or use of a direct laryngoscope is required or contraindicated for the optimal care of the patient.

## **4 Consent**

Use of a video laryngoscope and use of a direct laryngoscope are both common approaches to emergency tracheal intubation during emergency tracheal intubation in the ED and ICU. Both represent standard-of-care treatment in current clinical practice. Results from prior clinical trials are conflicting and do not demonstrate superiority of one approach over the other. Consequently, some guidelines do not strongly recommend for or against the use of a video laryngoscope or a direct laryngoscope on the first attempt at tracheal intubation of critically ill adults.<sup>17</sup> As a result, significant variation exists in the use of a video laryngoscope vs use of a direct laryngoscope in current clinical practice.<sup>2</sup> This trial will only enroll patients who are undergoing emergency tracheal intubation as part of their clinical care for whom the treating clinicians feel that either a video laryngoscope or a direct laryngoscope would be consistent with the optimal care of the patient. We will request a waiver of informed consent because the study involves minimal incremental risk and obtaining informed consent would be impracticable.

Participation in this study involves minimal incremental risk because:

- Both approaches to tracheal intubation being compared are commonly used in routine clinical care;
- Both are interventions to which patients would be exposed even if not participating in the study (all patients undergoing laryngoscopy and tracheal intubation receive either a video laryngoscope or a direct laryngoscope);
- No established differences in risk and benefit are known to exist between the two approaches based on the currently available data; and
- Patients are only eligible to participate if their treating clinicians have determined that both approaches are acceptable for the optimal care of the patient.

Obtaining informed consent would be impracticable because:

- **The expected medical condition of patients requiring emergency tracheal intubation in the ED or ICU is critical.** Based on prior trials in the same patient population and setting, approximately 70% of patients eligible for the DEVICE trial will be experiencing encephalopathy (altered mental status) due to their illness. The anticipated median Glasgow coma scale score will be 11 (equivalent to moderate brain injury). Among the minority of patients whose level of consciousness is not impaired, 45-55% will be experiencing acute delirium. Thus, most patients eligible for DEVICE will not have the capacity to provide informed consent. Further, family members or legally authorized representatives (LAR) are frequently unavailable when critically ill patients undergo intubation in the ED or ICU.
- **The time available for patients or LARs to consider participation will be insufficient.** Even in instances in which a patient retains capacity, or an LAR is immediately available, a meaningful informed consent is precluded by the rapid clinical events leading up to emergency tracheal intubation. No published literature has quantified the time from the decision to perform emergency tracheal intubation (the inclusion criteria for DEVICE) until the initiation of the intubation procedure (the trial intervention). In a convenience sample of 25 consecutive intubations in the VUMC ED or ICU, approximately 50% of intubations occurred within 5 minutes after treating clinicians verbalized the decision to intubate (or placed a written order for an induction medication). Obtaining informed consent for research requires study personnel to assess decisional capacity, identify an LAR when appropriate, review the informed consent document in a quiet setting, and provide sufficient time for the patient or LAR to process the information, assess the risks and benefits of participation, and ask questions. Meaningful informed consent cannot be executed in the 5 minutes between the decision to perform emergency tracheal intubation and the initiation of the procedure. Emergency tracheal intubation of critically ill adults is a time-sensitive procedure for which every minute of delay increases the likelihood of hypoxemia, hypotension, and peri-procedural cardiac arrest. Delaying emergency tracheal intubation for a critically ill adult to attempt a meaningful informed consent process would be unsafe, impracticable, and unethical.

Because the study involves minimal incremental risk, the study would not adversely affect the welfare or privacy rights of the participant, and obtaining informed consent would be impracticable, we will request a waiver of informed consent. Numerous previous randomized trials comparing two standards of

care for emergency intubation have also been completed under a waiver of informed consent, including multiple small trials comparing the identical interventions studied in DEVICE.<sup>8-16,18-25</sup>

#### **4.1 Information for Patients and Families**

Information regarding the study will be made available to each patient and family following intubation using a patient and family information sheet. The sheet will inform the patient of his or her enrollment in the DEVICE study, describe the study, and provide contact information for the research team for any questions or concerns.

### **5 Study Sites, Enrollment, and Randomization**

#### **5.1 Study Enrollment Locations**

1. Participating emergency departments
2. Participating intensive care units

#### **5.2 Study Enrollment Location**

- Participating emergency departments
- Participating intensive care units

#### **5.3 Enrollment and Randomization**

All patients requiring emergency tracheal intubation in a participating ED or ICU will be screened for eligibility for the DEVICE trial using the eligibility criteria in Section 3. Patients who do not meet inclusion criteria will be considered ‘ineligible.’ Patients who meet inclusion criteria but also meet at least one exclusion criterion will be considered ‘excluded.’ For patients who meet inclusion criteria but are not enrolled, the reason for exclusion will be recorded.

At enrollment, patients will be randomized in a 1:1 ratio to undergo intubation using a video laryngoscope or a direct laryngoscope using randomly permuted blocks of variable size. The randomization will be stratified by study site (each participating ED and ICU will comprise a different stratum). The study group assignments will be placed in opaque randomization envelopes, which will be located within participating units. Study group assignment will remain concealed to study personnel and treating clinicians until after the decision has been made to enroll the patient in the study.

To facilitate rapid enrollment during this time-sensitive procedure, sequentially numbered randomization envelopes will be located adjacent to the equipment required for emergency tracheal intubation (i.e., airway equipment cart, ICU work room). When the need for emergency tracheal intubation is recognized, envelopes will be obtained by the treating clinician performing the intubation (referred to as the “operator”) or by a delegate while the operator sets up the equipment required for intubation. Inclusion and exclusion criteria will be posted with randomization envelopes and printed on the outside of enrollment envelopes. As the operator sets up the equipment for emergency tracheal intubation, a verbal “pre-procedural time-out” (described below) will be performed. Based on the experience from our 8 prior randomized clinical trials using the same process to perform randomization and group assignment during emergency tracheal intubation, all enrollment procedures can be completed

in less than one minute. For a small number of particularly urgent intubations (e.g., an intubation for cardiac arrest), the urgency of the procedure or the limited availability of clinical personnel will preclude obtaining and opening the randomization envelope. These cases will be excluded using the exclusion criterion that states “Immediate need for tracheal intubation precludes safe performance of study procedures” (see Section 3).

As with all trials conducted to date by our investigators, we will evaluate for the possibility of selection bias via the systematic exclusion of particular groups of patients. A prospective list of excluded patients will be maintained by site PIs. Data captured on excluded patients will be limited to date of exclusion and reason for exclusion. Data captured on excluded patients will be limited to date of exclusion and reason for exclusion. The number and reasons for excluded will be reported at the time of trial publication via a consort diagram. No patient-level information on excluded patients will be entered into the study database. The coordinating center will not receive any patient-level data on excluded participants.

### **5.3.1 Pre-Procedural Time-Out to Prevent Enrollment of Ineligible Patients**

The enrollment materials for the trial will include instructions for a pre-procedural timeout in which treating clinicians or a delegate recite aloud the inclusion and exclusion criteria and confirm eligibility prior to enrollment. This process requires less than 10 seconds and can be completed while the equipment and medications needed for tracheal intubation are being obtained. This approach has been successfully used to confirm eligibility prior to enrollment in multiple prior trials [NCT03928925, NCT03787732].

### **5.3.2 Monitoring and Reporting of Eligibility of Enrolled Patients**

For all enrolled patients, study personnel will independently verify eligibility criteria at the time of study record creation. In the instance that a patient is enrolled who did not meet eligibility criteria, this will represent a protocol violation. Site investigators will report such a protocol violation to the trial primary investigators and coordinating center **within 24 hours** of becoming aware of the occurrence of a protocol violation. The primary investigators and coordinating center will report the details of such a protocol violation to the IRB **within 7 days** of becoming aware of the occurrence of a protocol violation.

### **5.3.3 Handling of Patients Found to Be Prisoners after Enrollment**

Prisoners typically present with obvious physical signs such as prison uniforms, handcuffs, and the presence of law enforcement. Training of treating clinicians and the enrollment procedures listed above (posting of inclusion and exclusion criteria alongside enrollment envelopes and a “pre-enrollment time-out” with verbal recitation of eligibility criteria) have proven to be effective in preventing the enrollment of prisoners in recent trials.

If a patient who presents to the ED or ICU is not known to be a prisoner at the time of enrollment and following enrollment is discovered to be a prisoner or becomes a prisoner between enrollment and the end of study follow up, all study procedures will stop immediately, the patient will be withdrawn from the study, and the patient’s study record will be expunged of all study data except the anonymous study ID and randomized group assignment. Because both study interventions are one-time, standard-of-care

interventions which the patient was likely to receive in clinical care even if not participating in research, no further follow-up will occur.

## **6 Study Procedures**

For enrolled patients, study group assignment determines only the choice of laryngoscope. Operators may opt to use the non-assigned laryngoscope type on the first laryngoscopy attempt if it is felt to be required for the safe care of the patient. The occurrence of such “crossover” event will be recorded along with the indication. All other aspects of the intubation procedure in both study groups will be at the discretion of the operator. For all patients in the trial, best practices in tracheal intubation will be encouraged according to clinical protocols in the study settings.

### **6.1 Video Laryngoscope Group**

For patients assigned to the video laryngoscope group, the operator will use a video laryngoscope on the first laryngoscopy attempt. A video laryngoscope will be defined as a laryngoscope with a camera and a video screen. Trial protocol will not dictate the brand of video laryngoscope.

### **6.2 Direct Laryngoscope Group**

For patients assigned to the direct laryngoscope group, the operator will use a direct laryngoscope on the first laryngoscopy attempt. A direct laryngoscope will be defined as a laryngoscope without a camera and a video screen. Trial protocol will not dictate the brand of direct laryngoscope or the blade shape. E

## **7 Data Collection and Outcome Measures**

### **7.1 Data Collection**

Data collected for the purposes of this study will come from three sources: [1] variables documented in the electronic health record as part of clinical care, [2] variables recorded by clinical staff’s bedside observation during the intubation procedure, and [3] variables reported by the operator immediately following the intubation procedure. Data from the electronic medical record will be collected by trained study personnel (key study personnel) using a standardized electronic case report form. It is infeasible to have research staff present during each emergency tracheal intubation. Therefore, clinical staff not participating in the tracheal intubation procedure will collect data elements relevant to outcomes of emergency tracheal intubation using a standardized electronic case report form. These variables are readily available by bedside observation and do not require interaction with the patient but are not uniformly documented in the electronic health record (e.g., lowest oxygen saturation and lowest blood pressure from induction to two minutes after tracheal intubation). Immediately following the intubation procedure, the operators will record data elements known only to them (e.g., glottic view obtained during the procedure and visualization of gastric aspiration in the oropharynx). Operators and clinical staff observing the procedure at the bedside will not be considered key study personnel. Training will be provided to clinicians who may serve as operators or bedside observers. The activities of these clinicians will be limited to the reporting of data routinely reported as part of clinical care.

The following variables will be recorded:

**Baseline:**

- age
- sex
- race and ethnicity
- height
- weight
- body mass index
- Acute Physiology and Chronic Health Evaluation (APACHE II) score
- active medical problems at the time of enrollment
- comorbidities
- indication for intubation
- vasopressor receipt in the hour prior to enrollment
- highest FiO<sub>2</sub> in the hour prior to enrollment
- lowest SpO<sub>2</sub>/FIO<sub>2</sub> ratio (or PaO<sub>2</sub>/FIO<sub>2</sub> ratio) in the hour prior to enrollment
- Glasgow Coma Scale score
- oxygen delivery device at enrollment
- assessment of the likelihood of a difficult intubation
- presence of difficult airway characteristics
  - limited mouth opening
  - limited anatomic neck mobility
  - cervical immobilization due to trauma
  - increased neck circumference
  - facial trauma
  - obesity
  - body fluids anticipated to obscure laryngeal view
- operator's level of training and specialty
- operator's prior intubation experience

**Peri-procedural:**

*Enrollment to induction*

- SpO<sub>2</sub> and FiO<sub>2</sub> at enrollment
- oxygen saturation from enrollment to induction
- approach to preoxygenation
- duration of preoxygenation

*Induction to first laryngoscopy attempt*

- time of sedative administration (induction)
- sedative agent and dose
- neuromuscular blocking agent and dose
- administration of an intravenous fluid bolus prior to induction
- administration of a vasopressor prior to induction
- SpO<sub>2</sub> at induction
- systolic blood pressure at induction
- approach to oxygen administration and ventilation between induction and laryngoscopy



### *First laryngoscopy attempt to successful intubation*

- time of start of first laryngoscopy attempt
- laryngoscope model, blade size, blade shape on first attempt
- use of video screen (if applicable) on first laryngoscopy attempt
- best Cormack-Lehane grade of glottic view on the first laryngoscopy attempt
- presences of body fluids obstructing laryngeal view
- presence of upper airway obstruction or edema
- receipt of chest compressions at time of first laryngoscopy attempt
- number of intubation attempts
  - number of times laryngoscope entered mouth
  - number of times bougie entered mouth (if applicable)
  - number of times endotracheal tube entered mouth
- reason for failure of first intubation attempt (if applicable)
- device(s) used on subsequent intubation attempts (if applicable)
- necessity of an additional operator
- esophageal intubation
- injury to the teeth
- operator-reported aspiration between induction and intubation
- time of successful tracheal intubation
- endotracheal tube size
- lowest SpO<sub>2</sub> from induction until 2 minutes after intubation
- lowest systolic blood pressure from induction until 2 minutes after intubation
- new or increased vasopressor use from induction until 2 minutes after intubation
- cardiac arrest from induction until 2 minutes after intubation not resulting in death within 1 hour of induction
- cardiac arrest from induction until 2 minutes after intubation resulting in death within 1 hour of induction

### **In-hospital:**

#### *24 hours after enrollment*

- new pneumothorax detected in the first 24 hours after induction
- vasopressor receipt at 24 hours after induction
- SpO<sub>2</sub> at 24 hours after induction
- FiO<sub>2</sub> at 24 hours after induction
- PEEP at 24 hours after induction
- systolic blood pressure at 24 hours after induction

#### *28 days after enrollment*

- 28-day in-hospital mortality
- ventilator-free days
- ICU-free days

## 7.2 Recorded Study Outcomes

### 7.2.1 Primary Outcome

The primary outcome is successful intubation on the first attempt. Successful intubation on the first attempt is defined as placement of an endotracheal tube in the trachea with a single insertion of a laryngoscope blade into the mouth and EITHER a single insertion of an endotracheal tube into the mouth OR a single insertion of a bougie into the mouth followed by a single insertion of an endotracheal tube over the bougie into the mouth.

The primary outcome will be collected by an observer trained in recording the number of insertions of the laryngoscope blade into the mouth and the number of insertions of a bougie and endotracheal tube into the mouth. If data on the primary outcome from the independent observer are missing, the operator's self-report of successful intubation on the first attempt will be used.

### 7.2.2 Secondary Outcome

The secondary outcome is severe complications occurring between induction and 2 minutes after successful intubation, defined as one or more of the following:

1. severe hypoxemia (lowest oxygen saturation measured by pulse oximetry < 80%);
2. severe hypotension (systolic blood pressure < 65 mm Hg or new or increased vasopressor administration);
3. cardiac arrest not resulting in death; or
4. cardiac arrest resulting in death.

Cardiac arrest will be considered to have resulted in death if a patient who experienced cardiac arrest between induction and 2 minutes after intubation died within the 1 hour following intubation.

### 7.2.3 Exploratory Outcomes

Exploratory procedural outcomes:

- Duration of laryngoscopy and tracheal intubation – defined as the interval (in seconds) between the first insertion of a laryngoscope blade into the mouth and the final placement of an endotracheal tube or tracheostomy tube in the trachea.
- Number of laryngoscopy attempts
- Number of attempts to cannulate the trachea with a bougie or an endotracheal tube
- Successful intubation on the first attempt without a severe complication
- Reason for failure to intubate on the first attempt
  - Inadequate view of the larynx
  - Inability to intubate the trachea with an endotracheal tube
  - Inability to cannulate the trachea with a bougie
  - Attempt aborted due to change in patient condition (e.g., worsening hypoxemia, hypotension, bradycardia, vomiting, bleeding)
  - Technical failure of the laryngoscope (e.g., battery, light source, camera, screen)
  - Other
- Operator-reported aspiration

#### Exploratory safety outcomes:

- Esophageal intubation
- Injury to the teeth

#### Exploratory clinical outcomes:

- ICU-free days in the first 28 days
- Ventilator free days in the first 28 days
- 28-day all-cause in-hospital mortality

## **8 Risks and Benefits**

### **8.1 Risks of Tracheal Intubation in the ED or ICU**

Patients who are severely ill enough to require emergency tracheal intubation in the ED or ICU as part of their clinical care are at high risk of complications. Many patients are undergoing intubation for hypoxemia or hemodynamic instability. Severe hypoxemia or cardiovascular instability occurs during nearly half of intubations in the ED and ICU, and cardiac arrest occurs in approximately 1-in-25 cases. In 10-20% of emergency tracheal intubations, clinicians are unable intubate the trachea on the first attempt, which increases the risk of these severe peri-intubation complications.<sup>1-4</sup>

Other complications during intubation may include aspiration (approximately 2.8% of cases), esophageal intubation (1.3%) injury to oral or dental structures (0.2%), and pneumothorax (0.1%). The long-term consequences of complications occurring during emergency tracheal intubation are unclear. Neurologic recovery from traumatic brain injury may be worse after hypoxemia due to secondary ischemic insult.

### **8.2 Potential Risks of Participation in the DEVICE Trial**

Participation in this study involves minimal incremental risk because:

- Both approaches to tracheal intubation being compared are commonly used in routine clinical care;
- Both are interventions to which patients would be exposed even if not participating in the study (all patients undergoing emergency tracheal intubation receive either a video or a direct laryngoscopy);
- No established differences in risk and benefit are known to exist between the two approaches based on the currently available data; and
- Patients are only eligible to participate if their treating clinicians have determined that both approaches are acceptable for the optimal care of the patient.

Although no risks are currently known to differ between intubation with a video laryngoscope and intubation with a direct laryngoscope (both standard-of-care approaches in currently clinical care), it is possible that the results of the DEVICE trial will ultimately demonstrate a difference between the two approaches in the risk of hypoxemia, hypotension, cardiac arrest, aspiration, or another outcome.

### **8.3 Potential Benefits of Participation in the DEVICE Trial**

The primary benefits of the DEVICE trial will be the indirect benefits to society that would result if one type of laryngoscope is found to prevent complications. Because millions of critically ill adults undergo

emergency tracheal intubation each year, if one of the two approaches were found to prevent serious complications, the findings would immediately improve the care provided to millions of severely ill patients. Compared to the minimal risks of participation in the study, the pursuit of these benefits is reasonable.

#### **8.4 Minimization of Risk**

Federal regulations 45 CFR 46.111(a)(1) require that risks to patients are minimized by using procedures which are consistent with sound research design. This trial meets this human subjects protection requirement by incorporating numerous design elements to minimize risk to patients.

Both video laryngoscopy and direct laryngoscopy have been used in clinical practice for years with an established safety profile in the same populations included in the DEVICE trial. To further mitigate risk, we will exclude patients for whom treating clinicians determine that a specific laryngoscope is required or contraindicated for the optimal care of the patient.

The trial protocol includes monitoring of adverse events, robust assessment of clinical outcomes, and an interim analysis by an independent DSMB, empowered to stop the trial or modify the trial protocol at any time.

Finally, to limit the risks associated with the collection of protected health information (PHI), the minimum amount of PHI necessary for study conduct will be collected. The data will be coded and stored in a secure online database (REDCap) only accessible by the investigators. REDCap tools will be used to ensure that the PHI that is collected is only visible to investigators at the healthcare system where the patient is enrolled. To protect participant privacy, REDCap tools will be used to ensure that only deidentified data can be exported for use during analysis.

## **9 Statistical Considerations**

### **9.1 General Considerations**

We will present summary tabulations by treatment group. For categorical variables, the number and proportion of patients within each category (with a category for missing data as needed) of the parameter will be presented. For continuous variables, the number of patients, mean or median as appropriate, and standard deviation or interquartile range as appropriate, will be presented.

We will analyze a single pre-specified primary outcome and a single pre-specified secondary outcome using a chi-square test. Consistent with recommendations of the Food and Drug Administration<sup>26</sup> and the European Medicines Agency,<sup>27</sup> each will be tested using a two-sided P value with a significance level of 0.05. For all other analyses except safety analyses, emphasis will be placed on the estimate of effect size with 95% confidence intervals, as recommended by the *International Committee of Medical Journal Editors*,<sup>28</sup> and no corrections for multiple comparisons will be performed.

### **9.2 Sample Size Estimation**

The minimum clinically important difference in successful intubation on the first attempt that would be required to justify routine use of a video laryngoscope rather than a direct laryngoscope in clinical care is uncertain. The current trial will be designed to detect a 5% absolute difference between groups in the incidence of successful intubation on the first attempt. An absolute difference of 5% in successful intubation on the first attempt is similar to or smaller than the difference considered to be clinically meaningful in the design of prior airway management trials.<sup>8,11,24</sup> Assuming an incidence of successful intubation on the first laryngoscopy attempt of 80% in the direct laryngoscope group based on data from a recently completed trial in the same ED and ICU settings, detecting a 5% absolute increase in the incidence of successful intubation on the first attempt with 90% power at a two-sided alpha level of 0.05 would require enrollment of 1,920 patients (960 per group), anticipating 16 enrolling sites (clusters) and an intra-cluster correlation of 0.05. Anticipating missing data for up to 4% of patients, we will plan to enroll a total of 2,000 patients (1,000 per group).

### **9.3 Analysis Populations**

The primary analysis will occur in an intent-to-treat (ITT) fashion among all patients randomized, excluding only those patients whose data was withdrawn from the study (e.g., a patient who became a prisoner during the follow up period).

### **9.4 Statistical Analysis**

Before enrollment is complete, a complete final statistical analysis plan will be made publicly available. Analyses conducted in accordance with the statistical analysis plan will be identified as *a priori*. Any additional analyses requested by the investigators or reviewers after completion of enrollment will be identified as *post hoc*.

#### **9.4.1 Primary Analysis**

*Main analysis of the primary outcome.* The primary analysis will be an intention-to-treat comparison of patients randomized to the video laryngoscope group versus patients randomized to the direct laryngoscope group with regard to the primary outcome of successful intubation on the first attempt. The difference in proportion and the associated 95% confidence interval will be presented. Between group differences will be examined using a Chi-square test.

#### **9.4.2 Secondary Analyses**

We will perform:

1. Intention-to-treat comparisons of secondary, exploratory, and safety outcomes; and
2. Intention-to-treat comparison of the primary outcome between groups using a generalized linear mixed effects model including a random effect for site and fixed effects for group assignment and pre-specified baseline variables, including: age; sex; body mass index; and location at enrollment (ED or ICU).

### 9.4.3 Effect Modification (Subgroup Analyses)

To evaluate whether pre-specified baseline variables modify the effect of study group assignment on the primary outcome, we will perform logistic regression modelling with the primary outcome as the dependent variable and independent variables of the study group, the proposed effect modifier, and the interaction between the two. Any interaction term with a p-value less than 0.1 will be considered to identify an effect modifier. To account for non-linear relationships, continuous variables will be analyzed using restricted cubic splines with between 3 and 5 knots. Forest plots will be used to graphically display the adjusted analyses, and locally weighted regression or partial effects plots will be used to portray the association between continuous covariates and the outcome. A full list of prespecified subgroup analyses will be outlined in the detailed Statistical Analysis Plan and will include:

- Operator Experience
  - Total number of previous intubations performed by operator
  - Number of previous intubations performed by operator with a direct laryngoscope
- Operator's planned video laryngoscope (hyperangulated blade vs. non-hyperangulated blade)
- Location (ED vs ICU)
- Presence of difficult airway characteristics
- Indication for tracheal intubation of trauma (Yes vs No)
- Chest compressions being delivered during the first laryngoscopy attempt (Yes vs No)

### 9.4.4 Handling of Missing Data

We anticipate that no data on the primary outcome will be missing. When data are missing for the secondary or exploratory outcomes, we will perform complete-case analysis, excluding cases where the data for the analyzed outcome are missing. There will be no imputation of missing data for these outcomes. In adjusted analyses, missing data for covariates will be imputed using multiple imputations.

### 9.4.5 Interim Analysis

The DSMB will conduct a single interim analysis for efficacy at the anticipated halfway point of the trial, after enrollment of 1,000 patients. The stopping boundary for efficacy will be met if the P value for the difference in the primary outcome (successful intubation on the first attempt) between groups using a Chi-square test is 0.001 or less. Using this conservative Haybittle–Peto boundary ( $P \leq 0.001$ ) will allow the final analysis to be performed using an unchanged level of significance.

The DSMB will reserve the right to stop the trial at any point, request additional data or interim analyses, or request modifications of the study protocol as required to protect patient safety.

At the interim analysis, the DSMB will evaluate the rate of the primary outcome in the direct laryngoscope group. If the rate of the primary outcome in the direct laryngoscope group differs substantially from the original estimate of 80.0%, the DSMB may suggest that the investigators perform a sample size re-estimation to maintain adequate statistical power to detect the planned relative risk difference in the primary outcome between groups.

## **10 Privacy and Confidentiality**

All patients will be assigned a unique study ID number for use in the coded study database. Study personnel will access patients' electronic health records at three planned time points: immediately following enrollment; when collecting baseline demographics and comorbidities (may occur anytime between enrollment and final data collection); and when collecting clinical outcomes (any time after the first of discharge or 28 days following intubation). The electronic health record may be accessed again, as needed, between enrollment and study publication to respond to queries from the coordinating center focused on ensuring data completeness and quality. The minimal PHI that is collected will be visible only to site investigators at the site where the patient was enrolled. The dataset for analysis will contain the unique study ID and no other patient identifiers. At the time of publication, a fully de-identified version of the database will be generated.

At no time during this study, its analysis, or its publication will patient identities be revealed in any manner. The minimum necessary data containing patient or provider identities will be collected. Data collected from the medical record will be entered into the secure online database REDCap. Hard copies of the data collection sheet completed at the time of the airway management event will be stored in a locked room until after the completion of enrollment and data cleaning. Following publication of the study results, all hard copies of data collection forms will be destroyed and the REDCap database will be fully de-identified in accordance with institutional regulations.

## **11 Follow-up and Record Retention**

Patients will be followed after enrollment for up to 28 days or until hospital discharge, whichever occurs first. Data collected from the medical record will be entered into the secure online database REDCap. Hard copies of the data collection sheet completed at the time of the airway management event will be stored in a locked room until after the completion of enrollment and data cleaning. Once data are verified and the database is locked, all hard copies of data collection forms will be destroyed. All data will be maintained in the secure online database REDCap until the time of study publication. The minimal PHI that is collected will be available only to site investigators at the site where the patient was enrolled. At the time of publication, a de-identified version of the database will be generated.

## **12 Safety Monitoring and Adverse Events**

Assuring patient safety is an essential component of this protocol. Use of a video laryngoscope and use of a direct laryngoscope are both standard-of-care interventions that have been used in clinical practice for decades with an established safety profile. However, any trial conducted during a high-risk, time-sensitive procedure like tracheal intubation of critically ill patients raises unique safety considerations. This protocol addresses these considerations through:

1. Exclusion criteria designed to prevent enrollment of patients likely to experience adverse events from intubation using a video laryngoscope or intubation using a direct laryngoscope;
2. Systematic collection of outcomes relevant to the safety of intubation using a video laryngoscope or intubation using a direct laryngoscope;
3. Structured monitoring, assessment, recording, and reporting of adverse events.

## 12.1 Adverse Event Definitions

**Adverse Event** – An adverse event will be defined as any untoward or unfavorable medical occurrence in a human subject temporally associated with the subject’s participation in the research, whether or not considered related to the subject’s participation in the research. Any adverse event occurring during the research will be classified according to the following characteristics:

- **Seriousness** – An adverse event will be considered “serious” if it:
  - Results in death;
  - Is life-threatening (defined as placing the patient at immediate risk of death);
  - Results in inpatient hospitalization or prolongation of existing hospitalization;
  - Results in a persistent or significant disability or incapacity;
  - Results in a congenital anomaly or birth defect; or
  - Based upon appropriate medical judgment, may jeopardize the patient’s health and may require medical or surgical intervention to prevent one of the other outcomes listed in this definition.
  
- **Unexpectedness** – An adverse event will be considered “unexpected” if the nature, severity, or frequency is neither consistent with:
  - The known or foreseeable risk of adverse events associated with the procedures involved in the research that are described in the protocol-related documents, such as the IRB-approved research protocol; nor
  - The expected natural progression of any underlying disease, disorder, or condition of the subject experiencing the adverse event and the subject’s predisposing risk factor profile for the adverse event.
  
- **Relatedness** – The strength of the relationship of an adverse event to a study intervention or study procedure will be defined as follows:
  - Definitely Related: The adverse event follows (1) a reasonable, temporal sequence from a study procedure AND (2) cannot be explained by the known characteristics of the patient’s clinical state or other therapies AND (3) evaluation of the patient’s clinical state indicates to the investigator that the experience is definitely related to study procedures.
  - Probably or Possibly Related: The adverse event meets some but not all of the above criteria for “Definitely Related”.
  - Probably Not Related: The adverse event occurred while the patient was on the study but can reasonably be explained by the known characteristics of the patient’s clinical state or other therapies.
  - Definitely Not Related: The adverse event is definitely produced by the patient’s clinical state or by other modes of therapy administered to the patient.
  - Uncertain Relationship: The adverse event does not fit in any of the above categories.

## 12.2 Monitoring for Adverse Events

The time interval during which patients will be monitored for the occurrence of adverse events begins at randomization and ends at the first of hospital discharge or 28 days. Adverse events occurring before randomization or after hospital discharge or 28 days will not be collected. The lead investigator at each enrolling site will have primary responsibility for overseeing the monitoring, assessment, and reporting



of adverse events. Site study personnel will evaluate for the occurrence of adverse events by manual review of the electronic health record and by communication with treating clinicians. Site study personnel will evaluate for the occurrence of adverse events by manual review of the electronic health record at two time points. The first will occur as close as feasible to 24 hours after randomization during initial data collection. The second will occur at the first of hospital discharge or 28 days after enrollment during final data collection. Study personnel at each site will also communicate regularly with the treating clinicians who perform tracheal intubation in the study environments between enrollment and 28 days after enrollment to solicit information about any potential adverse events. If study personnel at a site identify a potential adverse event, the lead investigator at the site will be immediately notified. The lead investigator at the site will assess the seriousness, unexpectedness, and relatedness of the potential adverse event. With assistance as needed from the coordinating center and the trial primary investigator, the lead investigator at the site will determine whether the event qualifies for recording and reporting.

### 12.3 Recording and Reporting Adverse Events

The following types of adverse events will be recorded and reported:

- Adverse events that are Serious and Definitely Related, Probably or Possibly Related, or of Uncertain Relationship.
- Adverse events that are Unexpected and Definitely Related, Probably or Possibly Related, or of Uncertain Relationship.

Adverse events that do not meet the above criteria will not be recorded or reported. Adverse events that the lead investigator at a site assesses to meet the above criteria for recording and reporting will be entered into the adverse event electronic case report form in the trial database. The lead investigator at the site will record an assessment of each characteristic for the adverse event, including seriousness, unexpectedness, and relatedness. For any adverse event that is **serious AND unexpected**, and definitely related, probably or possibly related, or of uncertain relationship, the lead investigator at the site will report the adverse event to the coordinating center and the trial primary investigators **within 24 hours** of becoming aware of the adverse event. For any other adverse event requiring recording and reporting, the lead investigator at the site will report the adverse event to the coordinating center and the trial primary investigators **within 72 hours** of becoming aware of the adverse event. The coordinating center and the trial principal investigator will coordinate with the lead investigator at the site to obtain information about the adverse event regarding each characteristic for the adverse event, including seriousness, expectedness, and relatedness. The lead investigator at the site will be responsible for making final determinations regarding seriousness and unexpectedness. The coordinating center and trial principal investigator will be responsible for making final determinations regarding relatedness.

For adverse events that meet the above criteria for recording and reporting, the coordinating center will notify the DSMB, the IRB, and the sponsor in accordance with the following reporting plan:

| Characteristics of the Adverse Event                                                                                                                  | Reporting Period                                                                    |
|-------------------------------------------------------------------------------------------------------------------------------------------------------|-------------------------------------------------------------------------------------|
| Fatal or life-threatening (and therefore serious), unexpected, and definitely related, probably or possibility related, or of uncertain relationship. | Report to the DSMB, IRB, and sponsor within 7 days after notification of the event. |
| Serious but non-fatal and non-life-threatening, unexpected, and definitely related, probably or possibly related, or of uncertain relationship.       | Report to DSMB, IRB, and sponsor within 15 days of notification of the event.       |
| All other adverse events meeting criteria for recording and reporting.                                                                                | Report to DSMB in regularly scheduled DSMB safety reports.                          |

The coordinating center will distribute the written summary of the DSMB’s periodic review of reported adverse events to the IRB in accordance with NIH guidelines: (<http://grants.nih.gov/grants/guide/notice-files/not99-107.html>).

#### 12.4 Clinical Outcomes that may be Exempt from Adverse Event Recording and Reporting

In this study of critically ill patients at high risk for death and other adverse outcomes due to their underlying critical illness, clinical outcomes, including death and organ dysfunction, will be systematically collected and analyzed for all patients. The primary, secondary, safety, and exploratory outcomes will be recorded and reported as clinical outcomes and not as adverse events unless treating clinicians or site investigators believe the event is Definitely Related or Probably or Possibly Related to the study intervention or study procedures. This approach – considering death and organ dysfunction as clinical outcomes rather than adverse events and systemically collecting these clinical outcomes for analysis – is common in ICU trials. This approach ensures comprehensive data on death and organ dysfunction for all patients, rather than relying on sporadic adverse event reporting to identify these important events. The following events are examples of study-specific clinical outcomes that would not be recorded and reported as adverse events unless treating clinicians or site investigators believe the event was Definitely Related or Probably or Possibly Related to the study intervention or study procedures:

- Death (all deaths occurring prior to hospital discharge or 28 days will be recorded);
- Organ dysfunction
  - Pulmonary – hypoxemia, aspiration, acute hypoxemic respiratory failure, pneumothorax
  - Cardiac – hypotension, shock, vasopressor receipt, cardiac arrest;
- Duration of mechanical ventilation;
- Duration of ICU admission;
- Duration of hospitalization

Note: A study-specific clinical outcome may also qualify as an adverse event meeting criteria for recording and reporting. For example, an injury to the teeth that the investigator considers Definitely Related to randomization to use of a direct laryngoscope would be both recorded as a study-specific clinical outcome and recorded and reported as a Serious and Definitely Related adverse event.

## 12.5 Unanticipated Problems Involving Risks to Subjects or Others

Investigators must also report Unanticipated Problems Involving Risks to Subjects or Others (“Unanticipated Problems”), regardless of severity, associated with study procedures **within 24 hours** of the site investigator becoming aware of the Unanticipated Problem. An Unanticipated Problem is defined as any incident, experience, or outcome that meets all of the following criteria:

- Unexpected (in terms of nature, severity, or frequency) given (a) the research procedures that are described in the protocol-related documents, such as the IRB-approved research protocol; and (b) the characteristics of the subject population being studied; AND
- Definitely Related or Probably or Possibly Related to participation in the research (as defined above in the section on characteristics of adverse events); AND
- Suggests that the research places subjects or others at a greater risk of harm (including physical, psychological, economic, or social harm) than was previously known or recognized.

If any study personnel at a site become aware of an event that may represent an Unanticipated problem, they will immediately contact the lead investigator for the site. The lead investigator at the site will assess whether the event represents an Unanticipated Problem by applying the criteria described above. If the lead investigator at the site determines that the event represents an Unanticipated Problem, the lead investigator at the site will record the Unanticipated Problem in the Unanticipated Problem electronic case report form in the trial database. The lead investigator at the site will then communicate that an Unanticipated Problem has occurred to the coordinating center and the trial principal investigator **within 24 hours** of the lead investigator at the site becoming aware of the Unanticipated Problem. The coordinating center and principal investigator will coordinate with the lead investigator at the site to obtain information about the Unanticipated Problem. The coordinating center will report the Unanticipated Problem to the DSMB, IRB, and sponsor within 15 days of becoming aware of the Unanticipated Problem.

## 13 Data and Safety Monitoring Board (DSMB)

The principal role of the DSMB is to assure the safety of patients in the trial. They will regularly monitor data from this trial, review and assess the performance of its operations, and make recommendations to the steering committee and sponsor with respect to:

- Participant safety and risk/benefit ratio of study procedures and interventions
- Initial approval of the protocol and subsequent amendments (with specific attention to study population, intervention, and study procedures)
- Adherence to the protocol requirements
- Completeness, quality, and planned analysis of data
- Ancillary study burden on participants and main study
- Possible early termination of the trial because of new external information, early attainment of study objectives, safety concerns, or inadequate performance

The DSMB will consist of members with expertise in bioethics, emergency medicine, pulmonary and critical care medicine, anesthesia, biostatistics, and clinical trials. Appointment of all members is contingent upon the absence of any conflicts of interest. All the members of the DSMB are voting members. The coordinating center, principal investigators, and unblinded study biostatistician will be responsible for the preparation of all DSMB and adverse event reports. The DSMB will develop a charter and review the protocol and patient notification forms during its first meeting. Subsequent DSMB meetings will be scheduled in accordance with the DSMB Charter. The DSMB will have the ability to recommend that the trial end, be modified, or continued unchanged.

## 14 References

1. Sakles JC, Chiu S, Mosier J, Walker C, Stolz U. The importance of first pass success when performing orotracheal intubation in the emergency department. *Acad Emerg Med.* 2013;20(1):71-78.
2. Russotto V, Myatra SN, Laffey JG, et al. Intubation Practices and Adverse Peri-intubation Events in Critically Ill Patients From 29 Countries. *JAMA.* 2021;325(12):1164-1172.
3. Brown CA 3rd, Bair AE, Pallin DJ, Walls RM, NEAR III Investigators. Techniques, success, and adverse events of emergency department adult intubations. *Ann Emerg Med.* 2015;65(4):363-370.e1.
4. Park L, Zeng I, Brainard A. Systematic review and meta-analysis of first-pass success rates in emergency department intubation: Creating a benchmark for emergency airway care. *Emerg Med Australas.* 2017;29(1):40-47.
5. Hirsch NP, Smith GB, Hirsch PO. Alfred Kirstein. Pioneer of direct laryngoscopy. *Anaesthesia.* 1986;41(1):42-45.
6. Burkle CM, Zepeda FA, Bacon DR, Rose SH. A historical perspective on use of the laryngoscope as a tool in anesthesiology. *The Journal of the American Society of Anesthesiologists.* 2004;100(4):1003-1006.
7. Mosier JM, Sakles JC, Law JA, Brown CA 3rd, Brindley PG. Tracheal Intubation in the Critically Ill. Where We Came from and Where We Should Go. *Am J Respir Crit Care Med.* 2020;201(7):775-788.
8. Driver BE, Prekker ME, Moore JC, Schick AL, Reardon RF, Miner JR. Direct Versus Video Laryngoscopy Using the C-MAC for Tracheal Intubation in the Emergency Department, a Randomized Controlled Trial. *Acad Emerg Med.* 2016;23(4):433-439.
9. Goksu E, Kilic T, Yildiz G, Unal A, Kartal M. Comparison of the C-MAC video laryngoscope to the Macintosh laryngoscope for intubation of blunt trauma patients in the ED. *Turk J Emerg Med.* 2016;16(2):53-56.
10. Griesdale DEG, Chau A, Isac G, et al. Video-laryngoscopy versus direct laryngoscopy in critically ill patients: a pilot randomized trial. *Can J Anaesth.* 2012;59(11):1032-1039.
11. Janz DR, Semler MW, Lentz RJ, et al. Randomized Trial of Video Laryngoscopy for Endotracheal Intubation of Critically Ill Adults. *Crit Care Med.* 2016;44(11):1980-1987.
12. Kim JW, Park SO, Lee KR, et al. Video laryngoscopy vs. direct laryngoscopy: Which should be chosen for endotracheal intubation during cardiopulmonary resuscitation? A prospective randomized controlled study of experienced intubators. *Resuscitation.* 2016;105:196-202.
13. Silverberg MJ, Li N, Acquah SO, Kory PD. Comparison of video laryngoscopy versus direct laryngoscopy during urgent endotracheal intubation: a randomized controlled trial. *Crit Care Med.* 2015;43(3):636-641.
14. Sulser S, Uebmann D, Schlaepfer M, et al. C-MAC videolaryngoscope compared with direct laryngoscopy for rapid sequence intubation in an emergency department: A randomised clinical trial. *Eur J Anaesthesiol.* 2016;33(12):943-948.
15. Yeatts DJ, Dutton RP, Hu PF, et al. Effect of video laryngoscopy on trauma patient survival: a randomized controlled trial. *J Trauma Acute Care Surg.* 2013;75(2):212-219.
16. Lascarrou JB, Boisrame-Helms J, Bailly A, et al. Video Laryngoscopy vs Direct Laryngoscopy on

Successful First-Pass Orotracheal Intubation Among ICU Patients: A Randomized Clinical Trial. *JAMA*. 2017;317(5):483-493.

17. Higgs A, McGrath BA, Goddard C, et al. Guidelines for the management of tracheal intubation in critically ill adults. *Br J Anaesth*. Published online 2017.  
<https://www.sciencedirect.com/science/article/pii/S000709121754060X>
18. Tekwani KL, Watts HF, Sweis RT, Rzechula KH, Kulstad EB. A comparison of the effects of etomidate and midazolam on hospital length of stay in patients with suspected sepsis: a prospective, randomized study. *Ann Emerg Med*. 2010;56(5):481-489.
19. Jabre P, Combes X, Lapostolle F, et al. Etomidate versus ketamine for rapid sequence intubation in acutely ill patients: a multicentre randomised controlled trial. *Lancet*. 2009;374(9686):293-300.
20. Semler MW, Janz DR, Lentz RJ, et al. Randomized Trial of Apneic Oxygenation during Endotracheal Intubation of the Critically Ill. *Am J Respir Crit Care Med*. 2016;193(3):273-280.
21. Janz DR, Semler MW, Joffe AM, et al. A Multicenter Randomized Trial of a Checklist for Endotracheal Intubation of Critically Ill Adults. *Chest*. 2018;153(4):816-824.
22. Semler MW, Janz DR, Russell DW, et al. A Multicenter, Randomized Trial of Ramped Position vs Sniffing Position During Endotracheal Intubation of Critically Ill Adults. *Chest*. 2017;152(4):712-722.
23. Caputo N, Azan B, Domingues R, et al. Emergency Department use of Apneic Oxygenation Versus Usual Care During Rapid Sequence Intubation: A Randomized Controlled Trial (The ENDAO Trial). *Acad Emerg Med*. 2017;24(11):1387-1394.
24. Driver BE, Prekker ME, Klein LR, et al. Effect of Use of a Bougie vs Endotracheal Tube and Stylet on First-Attempt Intubation Success Among Patients With Difficult Airways Undergoing Emergency Intubation: A Randomized Clinical Trial. *JAMA*. 2018;319(21):2179-2189.
25. Casey JD, Janz DR, Russell DW, et al. Bag-Mask Ventilation during Tracheal Intubation of Critically Ill Adults. *N Engl J Med*. 2019;380(9):811-821.
26. E9 Statistical Principles for Clinical Trials. Food and Drug Administration. Accessed June 9, 2021.  
<https://www.fda.gov/media/71336/download>
27. Statistical Principles for Clinical Trials. European Medicines Agency. Accessed June 9, 2021.  
[https://www.ema.europa.eu/en/documents/scientific-guideline/ich-e-9-statistical-principles-clinical-trials-step-5\\_en.pdf](https://www.ema.europa.eu/en/documents/scientific-guideline/ich-e-9-statistical-principles-clinical-trials-step-5_en.pdf)
28. Recommendations for the Conduct, Reporting, Editing, and Publication of Scholarly Work in Medical Journals. International Committee of Medical Journal Editors. Accessed June 9, 2021.  
<http://www.icmje.org/icmje-recommendations.pdf>

**Tracking of Protocol Versions:**

Version 1.0 – Initial Submission (September 30, 2021)

## **DirEct Versus Video LaryngosCope (DEVICE): Protocol and statistical analysis plan for a randomized clinical trial in critically ill adults undergoing emergency tracheal intubation**

Matthew E. Prekker, MD, MPH<sup>1,2</sup>; Brian E. Driver, MD<sup>2</sup>; Stacy A. Trent, MD, MSPH<sup>3,4</sup>; Daniel Resnick-Ault, MD<sup>4</sup>; Kevin P. Seitz, MD, MSc<sup>5</sup>; Derek W. Russell, MD<sup>6,7</sup>; Sheetal Gandotra, MD<sup>6</sup>; John P. Gaillard, MD<sup>8,9</sup>; Kevin W. Gibbs, MD<sup>10</sup>; Andrew J. Latimer, MD<sup>11</sup>; Micah R. Whitson, MD<sup>6,12</sup>; Shekhar A. Ghamande, MD<sup>13</sup>; Derek J. Vonderhaar, MD<sup>14</sup>; Jeremy P. Walco, MD<sup>15</sup>; Sydney J. Hansen, MD<sup>1,2</sup>; Ivor S. Douglas, MD<sup>16,17</sup>; Christopher R. Barnes, MD<sup>18</sup>; Vijay Krishnamoorthy, MD, PhD<sup>19</sup>; Jill J. Bastman, BSN, RN<sup>4</sup>; Bradley D. Lloyd, RRT-ACCS<sup>5</sup>; Sarah W. Robison, MD<sup>6,7</sup>; Jessica A. Palakshappa, MD, MS<sup>9</sup>; Steven H. Mitchell, MD<sup>11</sup>; David B. Page, MD, MSPH<sup>6</sup>; Heath D. White, DO, MS<sup>13</sup>; Alyssa Espinera, MD<sup>14</sup>; Christopher G. Hughes, MD, MSc<sup>15</sup>; Aaron Joffe, DO<sup>18</sup>; J. Taylor Herbert, MD, PhD<sup>19</sup>; LTC Steven G. Schauer, DO, MS<sup>20</sup>; Maj. Brit J. Long, MD<sup>21</sup>; Brant Imhoff, MS<sup>22</sup>; Li Wang, MS<sup>22</sup>; Jillian P. Rhoads, PhD<sup>23</sup>; Kelsey N. Womack, PhD<sup>23</sup>; David R. Janz, MD, MSc<sup>24</sup>; Wesley H. Self, MD, MPH<sup>23,25</sup>; Todd W. Rice, MD, MSc<sup>5</sup>; Adit A. Ginde, MD, MPH<sup>4</sup>; Jonathan D. Casey, MD, MSc<sup>5\*</sup>; Matthew W. Semler, MD, MSc<sup>5\*</sup>; for the DEVICE investigators and the Pragmatic Critical Care Research Group

\*denotes authors contributed equally to this work

1. Department of Medicine, Division of Pulmonary, Allergy, and Critical Care Medicine, Hennepin County Medical Center, Minneapolis, Minnesota, USA
2. Department of Emergency Medicine, Hennepin County Medical Center, Minneapolis, Minnesota, USA
3. Department of Emergency Medicine, Denver Health Medical Center, Denver, Colorado, USA
4. Department of Emergency Medicine, University of Colorado School of Medicine, Aurora, Colorado, USA

5. Department of Medicine, Division of Pulmonary and Critical Care Medicine, Vanderbilt University Medical Center, Nashville, Tennessee, USA
6. Department of Medicine, Division of Pulmonary, Allergy and Critical Care Medicine, University of Alabama at Birmingham Heersink School of Medicine, Birmingham, Alabama, USA
7. Pulmonary Section, Birmingham Veterans Affairs Medical Center, Birmingham, Alabama, USA
8. Department of Anesthesiology, Section on Critical Care, Atrium Health Wake Forest Baptist, Winston-Salem, North Carolina, USA
9. Department of Emergency Medicine, Atrium Health Wake Forest Baptist, Winston-Salem, North Carolina, USA
10. Section on Pulmonary, Critical Care, Allergy, and Immunology, Wake Forest School of Medicine, Winston-Salem, North Carolina, USA
11. Department of Emergency Medicine, University of Washington Harborview Medical Center, Seattle, Washington, USA
12. Department of Emergency Medicine, University of Alabama at Birmingham Heersink School of Medicine, Birmingham, Alabama, USA
13. Department of Medicine, Division of Pulmonary Disease, Critical Care, and Sleep Medicine, Baylor Scott & White Health, Temple, Texas, USA
14. Department of Pulmonary and Critical Care Medicine, Ochsner Health, New Orleans, Louisiana, USA
15. Department of Anesthesiology, Division of Anesthesia Critical Care Medicine, Vanderbilt University Medical Center, Nashville, Tennessee, USA
16. Division of Pulmonary, Critical Care, and Sleep Medicine, Denver Health, Denver, Colorado, USA



17. Department of Medicine, Division of Pulmonary and Critical Care Medicine, University of Colorado School of Medicine, Aurora, Colorado, USA
18. Department of Anesthesiology and Critical Care Medicine, University of Washington Harborview Medical Center, Seattle, Washington, USA
19. Department of Anesthesiology, Duke University School of Medicine, Durham, North Carolina, USA
20. United States Army Institute of Surgical Research, Joint Base San Antonio-Fort Sam Houston, San Antonio, Texas, USA
21. 59th Medical Wing, United States Air Force, Fort Sam Houston, San Antonio, Texas, USA
22. Department of Biostatistics, Vanderbilt University Medical Center, Nashville, Tennessee, USA
23. Vanderbilt Institute for Clinical and Translational Research, Vanderbilt University Medical Center, Nashville, Tennessee, USA
24. University Medical Center New Orleans and the Department of Medicine, Section of Pulmonary/Critical Care Medicine and Allergy/Immunology, Louisiana State University School of Medicine, New Orleans, Louisiana, USA
25. Department of Emergency Medicine, Vanderbilt University Medical Center, Nashville, Tennessee, USA

Corresponding author:

Matthew E. Prekker, MD, MPH

E-mail:

[matthew.prekker@hcmcd.org](mailto:matthew.prekker@hcmcd.org)

Address:

Department of Medicine, Mailcode G5

701 Park Avenue South

Minneapolis, Minnesota, USA 55415

Keywords for indexing:

Endotracheal intubation, video laryngoscope, direct laryngoscope

Subject Descriptor Number: 4.4 Clinical Trials in Critical Care Medicine

Manuscript word count (body only): 4,970

Abstract word count: 319

Supplemental digital content is available for this article

## **Abstract:**

### **Introduction:**

Among critically ill patients undergoing orotracheal intubation in the emergency department (ED) or intensive care unit (ICU), failure to visualize the vocal cords and intubate the trachea on the first attempt is associated with an increased risk of complications. Two types of laryngoscopes are commonly available: direct laryngoscopes and video laryngoscopes. For critically ill adults undergoing emergency tracheal intubation, it remains uncertain whether use of a video laryngoscope increases the incidence of successful intubation on the first attempt compared with use of a direct laryngoscope.

### **Methods and Analysis:**

The DirEct Versus Video LaryngosCopE (DEVICE) trial is a prospective, multi-center, non-blinded, randomized trial being conducted in 6 EDs and 10 ICUs in the United States. The trial plans to enroll up to 2,000 critically ill adults undergoing orotracheal intubation with a laryngoscope. Eligible patients are randomized 1:1 to the use of a video laryngoscope or a direct laryngoscope for the first intubation attempt. The primary outcome is successful intubation on the first attempt. The secondary outcome is the incidence of severe complications between induction and 2 minutes after intubation, defined as the occurrence of one or more of the following: severe hypoxemia (lowest oxygen saturation < 80%); severe hypotension (systolic blood pressure < 65 mm Hg or new or increased vasopressor administration); cardiac arrest; or death. Enrollment began on March 16, 2022 and is expected to be completed in 2023.

### **Ethics and Dissemination:**

The trial protocol was approved with waiver of informed consent by the single institutional review board at Vanderbilt University Medical Center and the Human Research Protection

Office of the Department of Defense. The results will be presented at scientific conferences and submitted for publication in a peer-reviewed journal.

### **Trial Registration**

ClinicalTrials.gov registration (NCT05239195) on February 14, 2022, prior to the enrollment of the first patient.

### **Strengths and Limitations of this Study**

- This protocol describes in detail the design and methods for a large, pragmatic trial of laryngoscope type for the emergency tracheal intubation of critically ill adults.
- Conduct in the emergency departments and intensive care units of multiple centers among operators with diverse prior experience with tracheal intubation, as well as broad patient eligibility criteria, will increase the external validity of trial results.
- Patients, clinicians, and investigators are not blinded to the study group assignment after randomization.

## Introduction

Tracheal intubation is a common procedure in the emergency department (ED) and intensive care unit (ICU). Among critically ill patients undergoing tracheal intubation, failure to intubate the trachea on the first attempt is associated with increased risk of complications, including hypoxemia, hypotension, aspiration, and cardiac arrest.<sup>1,2</sup>

Emergency tracheal intubation is typically performed in three discrete steps. First, the patient is administered medications to facilitate optimal intubating conditions (rapid sequence induction). Second, a clinician inserts a laryngoscope into the patient's mouth to visualize the vocal cords (laryngoscopy). Third, an endotracheal tube is inserted into the mouth, alongside the laryngoscope, and the tube is advanced past the vocal cords into the trachea (intubation).

The direct laryngoscope, the traditional instrument consisting of a battery-containing handle attached to a blade with a light source, has been used to visualize the vocal cords for tracheal intubation for over 100 years and remains the most commonly used device for the intubation of critically ill adults in the ED or ICU.<sup>2-5</sup> The operator uses the direct laryngoscope to displace the tongue and elevate the epiglottis to facilitate intubation of the trachea under direct visualization. Obtaining an adequate view of the larynx with a direct laryngoscope can be challenging, especially for inexperienced operators. Once a view of the larynx is obtained, passage of the endotracheal tube follows the operator's direct line-of-sight through the mouth to the vocal cords.

Over the last two decades, video laryngoscopes have provided an alternative to direct laryngoscopes for visualizing the vocal cords to facilitate tracheal intubation.<sup>6,7</sup> A camera embedded near the tip of the video laryngoscope blade transmits an image of the vocal cords to a screen that the operator can view during the procedure.<sup>8</sup> Because the camera is located near the tip of the laryngoscope blade, obtaining a view of the larynx may be easier with a video laryngoscope compared with a direct laryngoscope. However, because this view can be obtained without generating a direct line-of-sight through the mouth to the vocal cords, the

process of passing an endotracheal tube may be more difficult when using a video laryngoscope. When considering both aspects of tracheal intubation, visualizing the vocal cords and passing the endotracheal tube, it remains uncertain whether use of a video laryngoscope increases the incidence of successful intubation on the first attempt.

Among elective tracheal intubations in the operating room, use of video laryngoscope probably increases the incidence of successful intubation on the first attempt and decreases complications compared to use of a direct laryngoscope, supported with moderate certainty in the existing anesthesiology literature.<sup>9</sup> Extrapolating the results of randomized clinical trials conducted in the operating room to non-operating room settings is problematic because of factors related to the patient, the operator, and the environment.<sup>10,11</sup> Because tracheal intubation of critically ill adults outside of the operating room is common, complications of intubation in the ED and ICU are common, and use of a video laryngoscope during intubation in the ED and ICU has increased significantly over time,<sup>9,12</sup> understanding the effects of use of a video laryngoscope vs direct laryngoscope on successful intubation on the first attempt in these settings is a priority.

Previous trials randomizing patients to use of a video laryngoscope or a direct laryngoscope during emergency tracheal intubation in prehospital<sup>13-18</sup>, ED<sup>19-25</sup>, and ICU settings<sup>26-32</sup> have been small and heterogeneous and have generally suggested that while a video laryngoscope improves the view of the larynx and reduces the incidence of esophageal intubation, it may not affect the incidence of successful intubation on the first attempt. Findings were similar in the largest such trial to date, a 371-patient, multicenter, randomized clinical trial in French medical ICUs in which use of video laryngoscope failed to improve successful intubation on the first attempt (68% vs. 70%;  $p = 0.60$ ) and was associated with a greater incidence of severe peri-procedural complications in post-hoc analyses.<sup>33</sup>

The sample size of these prior trials did not provide sufficient statistical power to definitively rule out a clinically important effect of use of a video laryngoscope vs direct

laryngoscope on successful intubation on the first laryngoscopy attempt or the incidence of complications. To compare the effectiveness of these two commonly used devices during this important emergency procedure, a large trial conducted across a wide variety of clinical settings, operator specialties, and levels of operator experience is required. Therefore, we designed the DirEct Versus VIdeo LaryngosCopE (DEVICE) trial to test the hypothesis that, among critically ill adults undergoing emergency tracheal intubation in the ED or ICU, use of a video laryngoscope will increase the incidence of successful intubation on the first attempt compared with use of a direct laryngoscope.

## **Methods and Analysis**

This manuscript was written in accordance with Standard Protocol Items: Recommendations for Interventional Trials (SPIRIT) guidelines (Figure 1; supplementary file, section 1).<sup>34</sup>

### *Patient and Public Involvement*

Materials used to communicate details of the study with patients and family members were developed with input from the Vanderbilt Community Advisory Council. Study authors will disseminate the results of this study online and via social media in forms suitable for public understanding.

### *Study Design*

The DirEct Versus VIdeo LaryngosCopE (DEVICE) trial is a pragmatic, multicenter, unblinded, parallel-group, randomized trial comparing use of a video laryngoscope to use of a direct laryngoscope for the first attempt at emergency tracheal intubation among critically ill adults in the ED and ICU. The primary outcome is successful intubation on the first attempt. An



independent data and safety monitoring board (DSMB) is monitoring the progress and safety of the trial. Study institutions and investigators are listed in the supplementary file, section 2.

### *Study Population*

The inclusion criteria for this study are:

1. Patient is located in a participating unit
2. Planned procedure is orotracheal intubation using a laryngoscope.
3. Planned operator is a clinician expected to routinely perform tracheal intubation in the participating unit.

The exclusion criteria for the study are:

1. Patient is known to be less than 18 years old
2. Patient is known to be pregnant.
3. Patient is known to be a prisoner.
4. Immediate need for tracheal intubation precludes safe performance of study procedures.
5. Operator has determined that use of a video laryngoscope or use of a direct laryngoscope is required or contraindicated for the optimal care of the patient.

### *Randomization and Treatment Allocation*

Patients are randomized in a 1:1 ratio to undergo intubation using a video laryngoscope or using a direct laryngoscope for the first attempt in permuted blocks of variable size, stratified by study site. Study-group assignments are generated using a computerized randomization sequence, placed in sequentially numbered opaque envelopes, and distributed to enrolling sites. Before opening the envelope, the operator determines that the patient meets eligibility criteria, records the predicted difficulty of intubation (“easy”, “moderate”, or “difficult”) and selects the blade shape the operator plans to use if the patient is randomized to the video laryngoscope group (“hyperangulated” or “non-hyperangulated / standard geometry”). The

operator or delegate then opens the envelope. Patients are enrolled once the envelope is opened to reveal the study group assignment. After enrollment and randomization, patients, treating clinicians, and study personnel are not blinded to study group assignment.

### *Study Interventions*

#### *Video Laryngoscope Group*

For patients assigned to the video laryngoscope group, operators are instructed to use a video laryngoscope on the first laryngoscopy attempt. A video laryngoscope is defined as a laryngoscope with a camera and a video screen. Trial protocol does not dictate the brand of video laryngoscope or the geometry of the laryngoscope blade (e.g. hyperangulated vs. non-hyperangulated), but these details will be recorded. Operators are encouraged, but not required, to view the video screen during laryngoscopy (“indirect laryngoscopy”) and tracheal intubation.

#### *Direct Laryngoscope Group*

For patients assigned to the direct laryngoscope group, operators are instructed to use a direct laryngoscope on the first laryngoscopy attempt. A direct laryngoscope is defined as a laryngoscope without a camera and a video screen. Trial protocol does not dictate the brand of direct laryngoscope or the geometry of the laryngoscope blade (e.g. curved [Macintosh] vs. straight [Miller]), but these details will be recorded.

#### *Co-Interventions and Subsequent Attempts at Laryngoscopy and Intubation*

Study group assignment determines only the type of laryngoscope (video vs direct) used on the first laryngoscopy attempt. If determined to be required to ensure optimal care of the patient, treating clinicians may use any device at any time, regardless of study group assignment. Cases in which clinicians use a laryngoscope discordant with randomized assignment on the first intubation attempt will be documented and tracked. All aspects of the

intubation procedure, except the type of laryngoscope used on the first attempt, are at the discretion of treating clinicians, including selection of sedative and neuromuscular blocking medications, patient positioning, approach to pre-oxygenation, use of a bougie or a stylet, and endotracheal tube size. Best practices in tracheal intubation will be encouraged according to clinical protocols at the study sites. The trial intervention ends after the first attempt at laryngoscopy. If the first attempt is unsuccessful, the operator may use any method of intubation on subsequent intubation attempts, including use of a direct laryngoscope in the video laryngoscope group or use of a video laryngoscope in the direct laryngoscope group. The type of laryngoscope used during the initial and final laryngoscopy attempt will be collected and reported.

#### *Data Collection*

A trained observer, not directly involved with the intubation procedure, collects data for key peri-procedural outcomes. These outcomes include successful intubation on the first attempt, time interval between laryngoscopy and successful intubation, the oxygen saturation and systolic blood pressure at induction, the lowest oxygen saturation and systolic blood pressure between induction and 2 minutes after successful intubation, and new or increased vasopressor administration between induction and 2 minutes after successful intubation. Observers may be clinical personnel on the enrolling unit (e.g., physician, nurse, or pharmacist) or research study personnel.

Immediately following the intubation procedure, the operator completes a paper data collection form to record the approach to preoxygenation, oxygenation and ventilation between induction and laryngoscopy, the brand of laryngoscope used, the blade shape, the Cormack-Lehane grade of laryngeal view<sup>35</sup>, use of the video screen to visualize the larynx (if applicable), use of a bougie or a stylet, reasons for failure to intubate on the first attempt (if applicable), intubation approaches on subsequent attempts, difficult airway characteristics observed before

or during the procedure (facial trauma, small mouth opening, limited neck mobility, cervical collar, large neck, obesity, fluids obscuring view of vocal cords, upper airway obstruction or edema), and complications of intubation (witnessed pulmonary aspiration, esophageal intubation, injury to airways, injury to teeth, cardiac arrest between induction and 2 minutes following intubation). Operators record their specialty, training level, and estimates of the number of previous intubations they have performed and the number of previous intubations they have performed using a direct laryngoscope.

Study personnel at each site review the medical record to collect data on baseline patient characteristics, pre- and post-laryngoscopy management, and clinical outcomes at 28 days after enrollment.

The following variables are collected:

1. Baseline: Age, sex, height, weight, race, ethnicity, Acute Physiology and Chronic Health Evaluation II (APACHE II) score<sup>36</sup>, active medical problems at the time of enrollment, comorbidities, indication for intubation, vasopressor receipt in the hour prior to enrollment, highest FIO<sub>2</sub> in the hour prior to enrollment, lowest SpO<sub>2</sub>/FIO<sub>2</sub> (or PaO<sub>2</sub>/FIO<sub>2</sub>) ratio in the hour prior to enrollment, pre-procedural Glasgow Coma Scale (GCS) score<sup>37</sup>, oxygen delivery device at enrollment, assessment of the likelihood of a difficult intubation, presence of difficult airway characteristics (limited mouth opening, small mandible, large tongue, short neck, large neck circumference, limited anatomic neck mobility, cervical immobilization due to trauma, obesity), operator's level of training and specialty, operator's prior intubation experience.
2. Peri-procedural: Lowest SpO<sub>2</sub> from enrollment to induction, approach to and duration of pre-oxygenation, time of sedative administration, sedative agent and dose administered, neuromuscular blocking agent and dose administered, SpO<sub>2</sub> and systolic blood pressure at the time of induction, approach to oxygen administration and ventilation between

induction and the first attempt at laryngoscopy, time of start of first laryngoscopy attempt, laryngoscope used on first attempt (model, blade size, blade shape), use of video screen (if applicable) on the first laryngoscopy attempt, best Cormack-Lehane grade of view<sup>35</sup> on the first laryngoscopy attempt, presence of body fluid obstructing view of the larynx, presence of upper airway obstruction or edema, number of intubation attempts (number of times the laryngoscope entered the mouth, number of times the bougie entered mouth [if applicable], number of times the endotracheal tube entered the mouth), reason for failure of the first intubation attempt (if applicable), procedural adjustments made for the final intubation attempt, esophageal intubation, injury to teeth, operator-reported pulmonary aspiration between induction and intubation, time of successful tracheal intubation, endotracheal tube size, lowest SpO<sub>2</sub> from induction until 2 minutes after intubation, lowest systolic blood pressure from induction until 2 minutes after intubation, new or increased vasopressor administration from induction until 2 minutes after intubation, cardiac arrest from induction until 2 minutes after intubation not resulting in death within 1 hour of induction, cardiac arrest from induction until 2 minutes after intubation resulting in death within 1 hour of induction.

3. 24 hours after enrollment: new pneumothorax detected in the first 24 hours after induction, vasopressor receipt at 24 hours after induction, SpO<sub>2</sub> at 24 hours after induction, FIO<sub>2</sub> at 24 hours after induction, positive end-expiratory pressure (PEEP) at 24 hours after induction, systolic blood pressure at 24 hours after induction.
4. In-Hospital Outcomes: Ventilator-free days in the first 28 days, ICU-free days in the first 28 days, and in-hospital mortality at 28 days. Definitions for ICU-free days and ventilator-free days are provided in the supplementary file, sections 3 and 4.

### *Primary Outcome*

The primary outcome is successful intubation on the first attempt. Successful intubation

on the first attempt is defined as placement of an endotracheal tube in the trachea following a single insertion of a laryngoscope blade into the mouth and *either* a single insertion of an endotracheal tube into the mouth *or* a single insertion of a bougie into the mouth followed by a single insertion of an endotracheal tube into the mouth.

Data for the assessment of the primary outcome are collected by a trained independent observer using a structured data collection form that records the number of insertions of the laryngoscope blade, bougie (if used), and endotracheal tube into the patient's mouth. In the event that data from the independent observer are missing, data from the operator's self-report of successful intubation on the first attempt will be used.

### *Secondary Outcome*

The secondary outcome is the incidence of severe complications occurring between induction and 2 minutes following successful intubation. Severe complications are defined as one or more of the following:

- Severe hypoxemia (lowest oxygen saturation measured by pulse oximetry < 80%);
- Severe hypotension (systolic blood pressure < 65 mm Hg or new or increased vasopressor administration);
- Cardiac arrest not resulting in death
- Cardiac arrest resulting in death

Cardiac arrest will be considered to have resulted in death if a patient who experienced cardiac arrest between induction and 2 minutes after intubation died within the 1 hour following intubation.

### *Exploratory Outcomes*

Exploratory procedural outcomes are as follows:

- Duration of laryngoscopy and tracheal intubation. This is defined as the interval (in seconds) between the first insertion of a laryngoscope blade into the mouth and the final placement of an endotracheal tube or tracheostomy tube in the trachea.
- Number of laryngoscopy attempts
- Number of attempts to cannulate the trachea with a bougie or endotracheal tube
- Successful intubation on the first attempt without a severe complication
- Reason for failure to intubate the trachea on the first attempt, which include:
  - Inadequate view of the larynx
  - Inability to intubate the trachea with an endotracheal tube
  - Inability to cannulate the trachea with a bougie
  - Attempt aborted due to a change in patient condition (e.g. worsened hypoxemia, hypotension, bradycardia, vomiting, bleeding)
  - Technical failure of the laryngoscope (e.g. battery, light source, camera, screen)
  - Other
- Operator-reported aspiration

Exploratory safety outcomes are as follows:

- Esophageal intubation
- Injury to the teeth

Exploratory clinical outcomes are as follows:

- ICU-free days in the first 28 days
- Ventilator-free days in the first 28 days
- 28-day all-cause in-hospital mortality

### *Sample Size Estimation*

The minimum clinically important difference in successful intubation on the first attempt that would be needed to justify routine use of a video laryngoscope rather than a direct laryngoscope in the ED and ICU is uncertain. The current trial is designed to detect a 5% absolute difference between groups in the incidence of successful intubation on the first attempt. An absolute difference of 5% in successful intubation on the first attempt is similar to or smaller than the difference used in the design of prior airway management trials and is considered by airway management experts to be clinically meaningful.<sup>21,28,38,39</sup> Assuming (1) an incidence of successful intubation on the first attempt of 80% in the direct laryngoscope group, (2) 90% statistical power, (3) a two-sided alpha of 0.05, and (4) enrollment at 16 sites with an intra-cluster correlation for the primary outcome of 0.05, we calculated that detecting a 5% absolute increase in the incidence of successful intubation on the first attempt would require enrollment of 1,920 patients (960 per group). Anticipating missing data for up to 4% of enrolled patients, we will plan to enroll a total of 2,000 patients (1,000 per group).

### *Data and Safety Monitoring Board (DSMB) and Interim Analysis*

A DSMB composed of experts with backgrounds in emergency medicine, pulmonary and critical care medicine, anesthesiology, bioethics, and biostatistics has overseen the design of the trial and is monitoring its conduct. The DSMB will review a single interim analysis prepared by the study biostatistician at the anticipated halfway point of the trial, after enrollment of 1,000 patients. The stopping boundary for efficacy was pre-specified as a P-value of 0.001 or less, using a chi-square test, for the difference in the incidence of the primary outcome between groups. This conservative Haybittle–Peto boundary was selected to allow the final analysis to be performed using an unchanged level of significance ( $P < 0.05$ ). The DSMB retains the authority to stop the trial at any point, request additional data or interim analyses, or request modifications of the study protocol to protect patient safety. Trial safety monitoring and handling of adverse



events are described in detail in the supplementary file, section 5. Patient privacy and data storage details are listed in the supplementary file, section 6.

### *Statistical Analysis Principles*

Analyses will be conducted following reproducible research principles using R (R Foundation for Statistical Computing, Vienna, Austria).<sup>40</sup> We will present summary tabulations by treatment group. For categorical variables, the number and proportion of patients will be presented. For continuous variables, the mean and standard deviation or median and interquartile range will be presented, as appropriate.

We will analyze a single pre-specified primary outcome and a single pre-specified secondary outcome using a chi-square test. Consistent with recommendations of the Food and Drug Administration<sup>41</sup> and the European Medicines Agency<sup>42</sup>, each will be tested using a two-sided P value with a significance level of 0.05. The primary analysis will occur in an intent-to-treat fashion among all patients randomized, excluding only those patients whose data was withdrawn from the study. For all other analyses except safety analyses, emphasis will be placed on the estimate of effect size with 95% confidence intervals, as recommended by the *International Committee of Medical Journal Editors*<sup>43</sup>, and no corrections for multiple comparisons will be performed.

### *Main Analysis of the Primary Outcome*

The main analysis will be an unadjusted, intention-to-treat comparison of successful intubation on the first attempt between patients randomized to the video laryngoscope group and patients randomized to the direct laryngoscope group, using a chi-square test. The difference in proportions, the associated 95% confidence interval, and a p value for the primary outcome will be presented.

## *Secondary Analyses of the Primary Outcome*

### *Multivariable modeling to account for covariates*

To account for relevant covariates, we will develop a generalized linear mixed effects model using a logit link function with the primary outcome as the dependent variable, study site as a random effect, and fixed effects of study group and the following pre-specified baseline covariates: age, sex, body-mass index, operator experience quantified as the operator's total number of prior intubations, and location of intubation (ED vs ICU). All continuous variables will be modeled assuming a nonlinear relationship to the outcome using restricted cubic splines with between 3 and 5 knots.

### *Effect Modification*

We will examine whether pre-specified baseline variables modify the effect of study group assignment (video laryngoscope vs direct laryngoscope) on the primary outcome using a formal test of statistical interaction in a generalized linear mixed effects model with the primary outcome as the dependent variable, study site as a random effect, and fixed effects of study group, the pre-specified proposed effect modifier, and the interaction between the two. For categorical variables, we will present the odds ratio and 95% confidence intervals within each pre-specified subgroup. Continuous variables will not be dichotomized for analysis of effect modification but may be dichotomized for data presentation. In accordance with the Instrument for assessing the Credibility of Effect Modification Analyses (ICEMAN) recommendations<sup>44</sup>, we have prespecified the following limited number of baseline variables as potential effect modifiers and the hypothesized direction of effect modification for each:

1. Patient location (ED vs ICU). We hypothesize that patient location will not modify the effect of study group assignment on the primary outcome.
2. Traumatic injury (Yes vs No). We hypothesize that traumatic injury will modify the effect of study group assignment on the primary outcome, with a greater increase in the

incidence of successful intubation on the first attempt with use of a video laryngoscope compared with a direct laryngoscope among patients with traumatic injury compared to patients without traumatic injury.

3. Body mass index (kg/m<sup>2</sup>). We hypothesize that body mass index will modify the effect of study group assignment on the primary outcome, with a greater increase in the incidence of successful intubation on the first attempt with use of a video laryngoscope compared with a direct laryngoscope among patients with higher body mass index as compared to patients with lower body mass index. This hypothesis of effect modification is supported by a non-significant trend toward effect modification in a meta-analysis of multiple prior randomized trials.<sup>9</sup>
4. Operator's pre-enrollment assessment of the anticipated difficulty of intubation (Easy; Moderate; Difficult; Not Recorded). We hypothesize that the operator's pre-enrollment assessment will modify the effect of study group assignment on the primary outcome, with a greater increase in the incidence of successful intubation on the first attempt with use of a video laryngoscope compared with a direct laryngoscope among patients assessed as Difficult or Moderate compared to Easy. This hypothesis of effect modification is supported by significant effect modification in a meta-analysis of multiple prior randomized trials.<sup>9</sup>
5. Operator experience at the time of enrollment.
  1. Total number of previous intubations performed by operator. We hypothesize that the total number of previous intubations performed by the operator will modify the effect of study group assignment on the primary outcome, with a greater increase in the incidence of successful intubation on the first attempt with use of a video laryngoscope compared with a direct laryngoscope among operators with fewer previous intubations compared to operators with a greater number of previous intubations. This hypothesis of effect modification is supported by significant

effect modification observed in a prior randomized trial among critically ill adults, but differs from a meta-analysis including trials of intubation in the operating room that did not observe effect modification based on the operator's prior experience.<sup>9,28</sup>

2. Proportion of previous intubations performed by the operator using a direct laryngoscope. We hypothesize that the proportion of previous intubations performed by the operator using a direct laryngoscope will modify the effect of study group assignment on the primary outcome, with a greater increase in the incidence of successful intubation on the first attempt with use of a video laryngoscope compared with a direct laryngoscope among operators with a lower proportion of previous intubations performed by the operator using a direct laryngoscope compared to operators with a higher proportion of previous intubations performed by the operator using a direct laryngoscope.

We will also perform an effect modification analysis for the primary outcome that includes a three-way interaction between study group, total number of previous intubations performed by the operator, and proportion of previous intubations performed by the operator using a direct laryngoscope.

#### *Sensitivity Analyses of the Primary Outcome*

We will assess the robustness of the findings of the primary analysis in a number of sensitivity analyses. First, because operators may choose to deviate from the assigned laryngoscope for the safety of the patient, we will repeat the primary analysis, but will consider patients for whom the operator crossed over on the first attempt from the assigned laryngoscope type to the non-assigned laryngoscope type not to have experienced successful intubation on the first attempt. Second, we will repeat the primary analysis among only patients

for whom data on the primary outcome from the independent observer is available (i.e., excluding cases in which operator self-report was the sole source of information for the primary outcome). Third, because the operator's prior experience with each type of laryngoscope may affect the likelihood of success with a video laryngoscope compared with a direct laryngoscope, we will repeat the primary analysis among only cases in which the proportion of prior intubations the operator has performed using a direct laryngoscope is between 0.25 and 0.75.

### *Analysis of the Secondary Outcome*

For the secondary outcome, severe complications occurring between induction and 2 minutes following intubation, we will perform an unadjusted, intention-to-treat comparison of patients randomized to the video laryngoscope group versus patients randomized to the direct laryngoscope group, using a chi-square test.

### *Analyses of Exploratory Outcomes*

For all pre-specified exploratory outcomes, we will conduct unadjusted, intention-to-treat analyses comparing patients randomized to the video laryngoscope group versus patients randomized to the direct laryngoscope group. We will calculate absolute risk differences or differences in medians between groups with the associated 95% confidence intervals.

### *Handling of Missing Data*

We anticipate that no data on the primary outcome will be missing. When data are missing for the secondary or exploratory outcomes, we will perform complete-case analysis, excluding cases where the data for the analyzed outcome are missing. There will be no imputation of missing data for these outcomes. In adjusted analyses, missing data for covariates will be imputed using multiple imputations.

### *Trial status*

The DirEct Versus VIdeo LaryngosCopE (DEVICE) trial is a prospective, multi-center, non-blinded randomized clinical trial comparing use of a video laryngoscope to use of a direct laryngoscope for the first attempt at tracheal intubation of critically ill adults in the ED and ICU. Patient enrollment began on 16 March 2022 and is being conducted in 6 EDs and 10 ICUs in the United States.

## **Ethics and Dissemination**

### *Waiver of Informed Consent*

Critically ill patients undergoing tracheal intubation in the ED or ICU are at significant risk for morbidity and mortality from their underlying illness. Most patients undergoing tracheal intubation in routine clinical care are intubated using either a video laryngoscope or a direct laryngoscope on the first attempt. Any benefits or risks of these two approaches are experienced by patients undergoing tracheal intubation in clinical care, outside the context of research. As a requirement for enrollment in the DEVICE trial, the patient's treating clinician must believe that either a video laryngoscope or a direct laryngoscope would be a safe and reasonable approach for the patient (otherwise the patient is excluded). Therefore, making the decision between the two approaches randomly (by study group assignment) rather than by a clinician who thinks either approach is safe and reasonable for the patient is expected to pose no more than minimal additional risk.

Obtaining informed consent for participation in the study would be impracticable. The majority of patients undergoing emergency tracheal intubation lack decisional capacity due to their underlying critical illness and surrogate decision makers are frequently absent. Further, emergency tracheal intubation is a time-sensitive procedure with only minutes between the decision to perform intubation and the completion of the procedure. Meaningful informed consent could not be executed in this brief window and attempting to obtain informed consent

would lead to potentially deleterious and unethical delays in intubation which would increase the risk of hypoxemia, hypotension, and periprocedural cardiac arrest.

Because the study involves minimal incremental risk, the study would not adversely affect the welfare or privacy rights of the participant, and obtaining informed consent would be impracticable, a waiver of informed consent was requested from and approved by the single institutional review board at Vanderbilt University Medical Center (reference number 211272). This is consistent with previous randomized trials comparing alternative approaches to tracheal intubation commonly used in clinical care.<sup>28,38,39,45–50</sup> This approach was approved by the US Department of Defense (DoD) Defense Health Agency Human Research Protection Office (EIRB# 944893).

#### *Information for Patients and Families*

Information regarding the study is made available to patients and families using a patient and family information sheet. The patient and family information sheet contains information on the purpose of the trial, study procedures, risks and discomforts, benefits, use of protected health information, confidentiality, and investigator contact information. The Defense Health Agency Human Research Protection Office determined that this procedure meets the requirements of 32 CFR 219 and DODI 3216.02\_AFI40-402. At centers with a significant population of non-English speaking patients, the patient and family information sheet has been translated into Spanish and Somali languages and is made available to those patients.

#### *Protocol Changes*

Any further amendments to the protocol will be recorded on ClinicalTrials.gov as per SPIRIT guidelines. See the supplementary file, section 7, for details on how protocol changes will be handled.

### *Dissemination Plan*

Trial results will be submitted to a peer-reviewed journal and will be presented at one or more scientific conferences.



## **Authors' Contributions**

Approved the final version of this manuscript and critical revision of the manuscript for important intellectual content: all authors. Study concept and design: MEP, BED, SAT, SGS, BJL, DRG, WHS, TWR, AAG, JDC, MWS. Acquisition of data: all authors. Drafting of the manuscript and study supervision: MEP, BED, SAT, JDC, MWS.

## **Competing Interests**

Matthew W. Semler was supported by the National Heart Lung and Blood Institute (K23HL143053). Jonathan D. Casey was supported by the National Heart Lung and Blood Institute (K23HL153584-01). John P. Gaillard received support from the CHEST Foundation for instruction and travel. Todd W. Rice was supported in part by the National Institutes of Health and received consulting payments from Cumberland Pharmaceuticals, Inc. and Cytovale, Inc., and served on a data safety and monitoring board for Sanofi, Inc. All other authors have no competing interests.

## **Funding**

The research was funded in part by the Department of Defense, Defense Health Agency, J9 Office, RESTORAL program. Data collection utilized the Research Electronic Data Capture (REDCap) tool developed and maintained with Vanderbilt Institute for Clinical and Translational Research grant support (UL1 TR000445 from NCATS/NIH). The funding institutions had no role in (1) conception, design, or conduct of the study, (2) collection, management, analysis, interpretation, or presentation of the data, or (3) preparation, review, or approval of the manuscript. The views expressed are those of the authors and do not reflect the official views or policy of the Department of Defense or its components.

## References

1. Sakles JC, Chiu S, Mosier J, Walker C, Stolz U. The importance of first pass success when performing orotracheal intubation in the emergency department. *Acad Emerg Med* 2013;20(1):71–8.
2. Russotto V, Myatra SN, Laffey JG, et al. Intubation Practices and Adverse Peri-intubation Events in Critically Ill Patients From 29 Countries. *JAMA* 2021;325(12):1164–72.
3. Janeway HH. Intra-tracheal anesthesia from the standpoint of the nose, throat and oral surgeon with a description of a new instrument for catheterizing the trachea. *Laryngoscope* 1913;23(11):1082.
4. Miller RA. A NEW LARYNGOSCOPE. *Anesthesiology* 1941;2(3):317–20.
5. Macintosh RR. A NEW LARYNGOSCOPE. *Lancet* 1943;241(6233):205.
6. Kaplan MB, Ward DS, Berci G. A new video laryngoscope-an aid to intubation and teaching. *J Clin Anesth* 2002;14(8):620–6.
7. Cooper RM, Pacey JA, Bishop MJ, McCluskey SA. Early clinical experience with a new videolaryngoscope (GlideScope) in 728 patients. *Can J Anaesth* 2005;52(2):191–8.
8. Berkow LC, Morey TE, Urdaneta F. The Technology of Video Laryngoscopy. *Anesth Analg* 2018;126(5):1527–34.
9. Hansel J, Rogers AM, Lewis SR, Cook TM, Smith AF. Videolaryngoscopy versus direct laryngoscopy for adults undergoing tracheal intubation. *Cochrane Database Syst Rev* 2022;4:CD011136.
10. Cook TM, Woodall N, Harper J, Benger J, Fourth National Audit Project. Major complications of airway management in the UK: results of the Fourth National Audit Project of the Royal College of Anaesthetists and the Difficult Airway Society. Part 2: intensive care and emergency departments. *Br J Anaesth* 2011;106(5):632–42.
11. Karamchandani K, Wheelwright J, Yang AL, Westphal ND, Khanna AK, Myatra SN. Emergency Airway Management Outside the Operating Room: Current Evidence and Management Strategies. *Anesth Analg* 2021;133(3):648–62.
12. Monette DL, Brown CA 3rd, Benoit JL, et al. The Impact of Video Laryngoscopy on the Clinical Learning Environment of Emergency Medicine Residents: A Report of 14,313 Intubations. *AEM Educ Train* 2019;3(2):156–62.
13. Trimmel H, Kreutziger J, Fertsak G, Fitzka R, Dittrich M, Voelckel WG. Use of the Airtraq laryngoscope for emergency intubation in the prehospital setting: a randomized control trial. *Crit Care Med* 2011;39(3):489–93.
14. Arima T, Nagata O, Miura T, et al. Comparative analysis of airway scope and Macintosh laryngoscope for intubation primarily for cardiac arrest in prehospital setting. *Am J Emerg Med* 2014;32(1):40–3.
15. Trimmel H, Kreutziger J, Fitzka R, et al. Use of the GlideScope Ranger Video

- Laryngoscope for Emergency Intubation in the Prehospital Setting: A Randomized Control Trial. *Crit Care Med* 2016;44(7):e470–6.
16. Ducharme S, Kramer B, Gelbart D, Colleran C, Risavi B, Carlson JN. A pilot, prospective, randomized trial of video versus direct laryngoscopy for paramedic endotracheal intubation [Internet]. *Resuscitation*. 2017;114:121–6. Available from: <http://dx.doi.org/10.1016/j.resuscitation.2017.03.022>
  17. Kreutziger J, Hornung S, Harrer C, et al. Comparing the McGrath Mac Video Laryngoscope and Direct Laryngoscopy for Prehospital Emergency Intubation in Air Rescue Patients: A Multicenter, Randomized, Controlled Trial. *Crit Care Med* 2019;47(10):1362–70.
  18. Macke C, Gralla F, Winkelmann M, et al. Increased First Pass Success with C-MAC Videolaryngoscopy in Prehospital Endotracheal Intubation-A Randomized Controlled Trial. *J Clin Med Res [Internet]* 2020;9(9). Available from: <http://dx.doi.org/10.3390/jcm9092719>
  19. Yeatts DJ, Dutton RP, Hu PF, et al. Effect of video laryngoscopy on trauma patient survival: a randomized controlled trial. *J Trauma Acute Care Surg* 2013;75(2):212–9.
  20. Ahmadi K, Ebrahimi M, Hashemian AM, Sarshar S, Rahimi-Movaghar V. GlideScope Video Laryngoscope for Difficult Intubation in Emergency Patients: a Quasi-Randomized Controlled Trial. *Acta Med Iran* 2015;53(12):738–42.
  21. Driver BE, Prekker ME, Moore JC, Schick AL, Reardon RF, Miner JR. Direct Versus Video Laryngoscopy Using the C-MAC for Tracheal Intubation in the Emergency Department, a Randomized Controlled Trial. *Acad Emerg Med* 2016;23(4):433–9.
  22. Goksu E, Kilic T, Yildiz G, Unal A, Kartal M. Comparison of the C-MAC video laryngoscope to the Macintosh laryngoscope for intubation of blunt trauma patients in the ED. *Turk J Emerg Med* 2016;16(2):53–6.
  23. Kim JW, Park SO, Lee KR, et al. Video laryngoscopy vs. direct laryngoscopy: Which should be chosen for endotracheal intubation during cardiopulmonary resuscitation? A prospective randomized controlled study of experienced intubators. *Resuscitation* 2016;105:196–202.
  24. Sulser S, Ubmann D, Schlaepfer M, et al. C-MAC videolaryngoscope compared with direct laryngoscopy for rapid sequence intubation in an emergency department: A randomised clinical trial. *Eur J Anaesthesiol* 2016;33(12):943–8.
  25. Sanguanwit P, Yuksen C, Laowattana N. Direct Versus Video Laryngoscopy in Emergency Intubation: A Randomized Control Trial Study. *Bull Emerg Trauma* 2021;9(3):118–24.
  26. Griesdale DEG, Chau A, Isac G, et al. Video-laryngoscopy versus direct laryngoscopy in critically ill patients: a pilot randomized trial. *Can J Anaesth* 2012;59(11):1032–9.
  27. Silverberg MJ, Li N, Acquah SO, Kory PD. Comparison of video laryngoscopy versus direct laryngoscopy during urgent endotracheal intubation: a randomized controlled trial. *Crit Care Med* 2015;43(3):636–41.
  28. Janz DR, Semler MW, Lentz RJ, et al. Randomized Trial of Video Laryngoscopy for Endotracheal Intubation of Critically Ill Adults. *Crit Care Med* 2016;44(11):1980–7.
  29. Abdelgalel EF, Mowafy SMS. Comparison between Glidescope, Airtraq and Macintosh

- laryngoscopy for emergency endotracheal intubation in intensive care unit: Randomized controlled trial. *Egyptian Journal of Anaesthesia* 2018;34(4):123–8.
30. Gao Y-X, Song Y-B, Gu Z-J, et al. Video versus direct laryngoscopy on successful first-pass endotracheal intubation in ICU patients. *World J Emerg Med* 2018;9(2):99–104.
  31. Dey S, Pradhan D, Saikia P, Bhattacharyya P, Khandelwal H, Adarsha KN. Intubation in the Intensive Care Unit: C-MAC video laryngoscope versus Macintosh laryngoscope. *Med Intensiva* 2020;44(3):135–41.
  32. Dharanindra. A comparative study of King Vision video laryngoscope and Macintosh laryngoscope for intubation in the ICU. *Indian J Crit Care Med* 2020;24 Suppl (2):S38–9.
  33. Lascarrou JB, Boisrame-Helms J, Bailly A, et al. Video Laryngoscopy vs Direct Laryngoscopy on Successful First-Pass Orotracheal Intubation Among ICU Patients: A Randomized Clinical Trial. *JAMA* 2017;317(5):483–93.
  34. Chan A-W, Tetzlaff JM, Gøtzsche PC, et al. SPIRIT 2013 explanation and elaboration: guidance for protocols of clinical trials. *BMJ* 2013;346:e7586.
  35. Cormack RS, Lehane J. Difficult tracheal intubation in obstetrics. *Anaesthesia* 1984;39(11):1105–11.
  36. Knaus WA, Draper EA, Wagner DP, Zimmerman JE. APACHE II: a severity of disease classification system. *Crit Care Med* 1985;13(10):818–29.
  37. Teasdale G, Jennett B. Assessment of coma and impaired consciousness. A practical scale. *Lancet* 1974;2(7872):81–4.
  38. Driver BE, Prekker ME, Klein LR, et al. Effect of Use of a Bougie vs Endotracheal Tube and Stylet on First-Attempt Intubation Success Among Patients With Difficult Airways Undergoing Emergency Intubation: A Randomized Clinical Trial. *JAMA* 2018;319(21):2179–89.
  39. Driver BE, Semler MW, Self WH, et al. Effect of Use of a Bougie vs Endotracheal Tube With Stylet on Successful Intubation on the First Attempt Among Critically Ill Patients Undergoing Tracheal Intubation: A Randomized Clinical Trial. *JAMA* 2021;326(24):2488–97.
  40. RStudio Team. RStudio: Integrated Development for R [Internet]. 2015; Available from: <http://www.rstudio.com>
  41. E9 Statistical Principles for Clinical Trials [Internet]. Food and Drug Administration. [cited 2021 Jun 9]; Available from: <https://www.fda.gov/media/71336/download>
  42. Statistical Principles for Clinical Trials [Internet]. European Medicines Agency. [cited 2021 Jun 9]; Available from: [https://www.ema.europa.eu/en/documents/scientific-guideline/ich-e-9-statistical-principles-clinical-trials-step-5\\_en.pdf](https://www.ema.europa.eu/en/documents/scientific-guideline/ich-e-9-statistical-principles-clinical-trials-step-5_en.pdf)
  43. Recommendations for the Conduct, Reporting, Editing, and Publication of Scholarly Work in Medical Journals [Internet]. International Committee of Medical Journal Editors. [cited 2021 Jun 9]; Available from: <http://www.icmje.org/icmje-recommendations.pdf>

44. Schandelmaier S, Briel M, Varadhan R, et al. Development of the Instrument to assess the Credibility of Effect Modification Analyses (ICEMAN) in randomized controlled trials and meta-analyses. *CMAJ* 2020;192(32):E901–6.
45. Janz DR, Semler MW, Joffe AM, et al. A Multicenter Randomized Trial of a Checklist for Endotracheal Intubation of Critically Ill Adults. *Chest* 2018;153(4):816–24.
46. Semler MW, Janz DR, Lentz RJ, et al. Randomized Trial of Apneic Oxygenation during Endotracheal Intubation of the Critically Ill. *Am J Respir Crit Care Med* 2016;193(3):273–80.
47. Casey JD, Janz DR, Russell DW, et al. Bag-Mask Ventilation during Tracheal Intubation of Critically Ill Adults. *N Engl J Med* 2019;380(9):811–21.
48. Janz DR, Casey JD, Semler MW, et al. Effect of a fluid bolus on cardiovascular collapse among critically ill adults undergoing tracheal intubation (PrePARE): a randomised controlled trial. *Lancet Respir Med* 2019;7(12):1039–47.
49. Semler MW, Janz DR, Russell DW, et al. A Multicenter, Randomized Trial of Ramped Position vs Sniffing Position During Endotracheal Intubation of Critically Ill Adults. *Chest* 2017;152(4):712–22.
50. Russell DW, Casey JD, Gibbs KW, et al. Effect of Fluid Bolus Administration on Cardiovascular Collapse Among Critically Ill Patients Undergoing Tracheal Intubation: A Randomized Clinical Trial. *JAMA* 2022;328(3):270–9.

## Figure Legend

**Figure 1.** Schedule of enrollment, interventions, and assessments in the DEVICE trial. TI, tracheal intubation.

|                                 | STUDY PERIOD           |                      |                 |    |                  |                   |                                       |
|---------------------------------|------------------------|----------------------|-----------------|----|------------------|-------------------|---------------------------------------|
|                                 | Eligibility Screen     | Randomize & Allocate | Peri-Procedural |    |                  |                   | Final Outcome Assessment              |
| TIMEPOINT                       | Decision to perform TI | Prior to TI          | Induction       | TI | 0-2 min after TI | 0-48 hrs after TI | Discharge or 28 days after enrollment |
| <b>ENROLLMENT:</b>              |                        |                      |                 |    |                  |                   |                                       |
| Eligibility Screen              | X                      |                      |                 |    |                  |                   |                                       |
| Allocation                      |                        | X                    |                 |    |                  |                   |                                       |
| <b>INTERVENTIONS:</b>           |                        |                      |                 |    |                  |                   |                                       |
| Video Laryngoscope              |                        |                      |                 | X  |                  |                   |                                       |
| Direct Laryngoscope             |                        |                      |                 | X  |                  |                   |                                       |
| Screening for Contraindications | X                      | X                    | X               | X  |                  |                   |                                       |
| <b>ASSESSMENTS:</b>             |                        |                      |                 |    |                  |                   |                                       |
| Baseline Variables              | X                      | X                    |                 |    |                  |                   |                                       |
| Peri-Procedural Variables       |                        | X                    | X               | X  | X                |                   |                                       |
| Clinical Outcomes               |                        |                      |                 |    |                  | X                 | X                                     |

# BMJ Open DirEct versus Video LaryngosCope (DEVICE): protocol and statistical analysis plan for a randomised clinical trial in critically ill adults undergoing emergency tracheal intubation

Matthew E Prekker <sup>1,2</sup>, Brian E Driver,<sup>1</sup> Stacy A Trent <sup>3,4</sup>, Daniel Resnick-Ault,<sup>4</sup> Kevin Seitz,<sup>5</sup> Derek W Russell <sup>6,7</sup>, Sheetal Gandotra <sup>7</sup>, John P Gaillard,<sup>8,9</sup> Kevin W Gibbs,<sup>10</sup> Andrew Latimer,<sup>11</sup> Micah R Whitson,<sup>7,12</sup> Shekhar Ghamande,<sup>13</sup> Derek J Vonderhaar,<sup>14</sup> Jeremy P Walco,<sup>15</sup> Sydney J Hansen,<sup>1,2</sup> Ivor S Douglas,<sup>16,17</sup> Christopher R Barnes,<sup>18</sup> Vijay Krishnamoorthy,<sup>19</sup> Jill J Bastman,<sup>4</sup> Bradley Daniel Lloyd,<sup>20</sup> Sarah W Robison,<sup>6,7</sup> Jessica A Palakshappa,<sup>10</sup> Steven Mitchell,<sup>11</sup> David B Page,<sup>7</sup> Heath D White,<sup>13</sup> Alyssa Espinera,<sup>14</sup> Christopher Hughes,<sup>15</sup> Aaron M Joffe,<sup>18</sup> J Taylor Herbert <sup>19</sup>, Steven G Schauer,<sup>21</sup> Brit J Long,<sup>22</sup> Brant Imhoff,<sup>23</sup> Li Wang,<sup>23</sup> Jillian P Rhoads,<sup>24</sup> Kelsey N Womack,<sup>24</sup> David Janz,<sup>25</sup> Wesley H Self,<sup>20,24</sup> Todd W Rice,<sup>5</sup> Adit A Ginde,<sup>4</sup> Jonathan D Casey,<sup>5</sup> Matthew W Semler <sup>5</sup>, for the DEVICE investigators and the Pragmatic Critical Care Research Group

**To cite:** Prekker ME, Driver BE, Trent SA, *et al.* DirEct versus Video LaryngosCope (DEVICE): protocol and statistical analysis plan for a randomised clinical trial in critically ill adults undergoing emergency tracheal intubation. *BMJ Open* 2023;**13**:e068978. doi:10.1136/bmjopen-2022-068978

► Prepublication history and additional supplemental material for this paper are available online. To view these files, please visit the journal online (<http://dx.doi.org/10.1136/bmjopen-2022-068978>).

JDC and MWS contributed equally.

Received 10 October 2022  
Accepted 23 December 2022

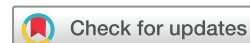

© Author(s) (or their employer(s)) 2023. Re-use permitted under CC BY-NC. No commercial re-use. See rights and permissions. Published by BMJ.

For numbered affiliations see end of article.

## Correspondence to

Dr Matthew E Prekker;  
[Matthew.Prekker@hcmcd.org](mailto:Matthew.Prekker@hcmcd.org)

## ABSTRACT

**Introduction** Among critically ill patients undergoing orotracheal intubation in the emergency department (ED) or intensive care unit (ICU), failure to visualise the vocal cords and intubate the trachea on the first attempt is associated with an increased risk of complications. Two types of laryngoscopes are commonly available: direct laryngoscopes and video laryngoscopes. For critically ill adults undergoing emergency tracheal intubation, it remains uncertain whether the use of a video laryngoscope increases the incidence of successful intubation on the first attempt compared with the use of a direct laryngoscope.

**Methods and analysis** The DirEct versus Video LaryngosCope (DEVICE) trial is a prospective, multicentre, non-blinded, randomised trial being conducted in 7 EDs and 10 ICUs in the USA. The trial plans to enrol up to 2000 critically ill adults undergoing orotracheal intubation with a laryngoscope. Eligible patients are randomised 1:1 to the use of a video laryngoscope or a direct laryngoscope for the first intubation attempt. The primary outcome is successful intubation on the first attempt. The secondary outcome is the incidence of severe complications between induction and 2 min after intubation, defined as the occurrence of one or more of the following: severe hypoxaemia (lowest oxygen saturation <80%); severe hypotension (systolic blood pressure <65 mm Hg or new or increased vasopressor administration); cardiac arrest or death. Enrolment began on 19 March 2022 and is expected to be completed in 2023.

**Ethics and dissemination** The trial protocol was approved with waiver of informed consent by the single

## STRENGTHS AND LIMITATIONS OF THIS STUDY

- ⇒ This protocol describes in detail the design and methods for a large, pragmatic trial of laryngoscope type for the emergency tracheal intubation of critically ill adults.
- ⇒ Conduct in the emergency departments and intensive care units of multiple centres among operators with diverse prior experience with tracheal intubation, as well as broad patient eligibility criteria, will increase the external validity of trial results.
- ⇒ Patients, clinicians and investigators are not blinded to the study group assignment after randomisation.

institutional review board at Vanderbilt University Medical Center and the Human Research Protection Office of the Department of Defense. The results will be presented at scientific conferences and submitted for publication in a peer-reviewed journal.

**Trial registration number** ClinicalTrials.gov Registry (NCT05239195).

## INTRODUCTION

Tracheal intubation is a common procedure in the emergency department (ED) and intensive care unit (ICU). Among critically ill patients undergoing tracheal intubation, failure to intubate the trachea on the first attempt is associated with increased risk of



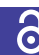

complications, including hypoxaemia, hypotension, aspiration and cardiac arrest.<sup>1 2</sup>

Emergency tracheal intubation is typically performed in three discrete steps. First, the patient is administered medications to facilitate optimal intubating conditions (rapid sequence induction). Second, a clinician inserts a laryngoscope into the patient's mouth to visualise the vocal cords (laryngoscopy). Third, an endotracheal tube is inserted into the mouth, alongside the laryngoscope, and the tube is advanced past the vocal cords into the trachea (intubation).

The direct laryngoscope, the traditional instrument consisting of a battery-containing handle attached to a blade with a light source, has been used to visualise the vocal cords for tracheal intubation for over 100 years and remains the most commonly used device for the intubation of critically ill adults in the ED or ICU.<sup>2-5</sup> The operator uses the direct laryngoscope to displace the tongue and elevate the epiglottis to facilitate intubation of the trachea under direct visualisation. Obtaining an adequate view of the larynx with a direct laryngoscope can be challenging, especially for inexperienced operators. Once a view of the larynx is obtained, passage of the endotracheal tube follows the operator's direct line of sight through the mouth to the vocal cords.

Over the last two decades, video laryngoscopes have provided an alternative to direct laryngoscopes for visualising the vocal cords to facilitate tracheal intubation.<sup>6 7</sup> A camera embedded near the tip of the video laryngoscope blade transmits an image of the vocal cords to a screen that the operator can view during the procedure.<sup>8</sup> Because the camera is located near the tip of the laryngoscope blade, obtaining a view of the larynx may be easier with a video laryngoscope compared with a direct laryngoscope. However, because this view can be obtained without generating a direct line of sight through the mouth to the vocal cords, the process of passing an endotracheal tube may be more difficult when using a video laryngoscope. When considering both aspects of tracheal intubation, visualising the vocal cords and passing the endotracheal tube, it remains uncertain whether the use of a video laryngoscope increases the incidence of successful intubation on the first attempt.

Among elective tracheal intubations in the operating room, the use of video laryngoscope probably increases the incidence of successful intubation on the first attempt and decreases complications compared with the use of a direct laryngoscope, supported with moderate certainty in the existing anaesthesiology literature.<sup>9</sup> Extrapolating the results of randomised clinical trials conducted in the operating room to non-operating room settings is problematic because of factors related to the patient, the operator and the environment.<sup>10 11</sup> Because tracheal intubation of critically ill adults outside of the operating room is common, complications of intubation in the ED and ICU are common, and the use of a video laryngoscope during intubation in the ED and ICU has increased significantly over time,<sup>9 12</sup> understanding the effects of

use of a video laryngoscope versus direct laryngoscope on successful intubation on the first attempt in these settings is a priority.

Previous trials randomising patients to the use of a video laryngoscope or a direct laryngoscope during emergency tracheal intubation in prehospital,<sup>13-18</sup> ED<sup>19-25</sup> and ICU settings<sup>26-32</sup> have been small and heterogeneous and have generally suggested that while a video laryngoscope improves the view of the larynx and reduces the incidence of oesophageal intubation, it may not affect the incidence of successful intubation on the first attempt. Findings were similar in the largest such trial to date, a 371-patient, multicentre, randomised clinical trial in French medical ICUs in which the use of video laryngoscope failed to improve successful intubation on the first attempt (68% vs 70%;  $p=0.60$ ) and was associated with a greater incidence of severe periprocedural complications in post-hoc analyses.<sup>33</sup>

The sample size of these prior trials did not provide sufficient statistical power to definitively rule out a clinically important effect of the use of a video laryngoscope versus direct laryngoscope on successful intubation on the first laryngoscopy attempt or the incidence of complications. To compare the effectiveness of these two commonly used devices during this important emergency procedure, a large trial conducted across a wide variety of clinical settings, operator specialties and levels of operator experience is required. Therefore, we designed the **DirEct versus VIdeo LaryngosCope** (DEVICE) trial to test the hypothesis that, among critically ill adults undergoing emergency tracheal intubation in the ED or ICU, the use of a video laryngoscope will increase the incidence of successful intubation on the first attempt compared with the use of a direct laryngoscope.

## METHODS AND ANALYSIS

This manuscript was written in accordance with Standard Protocol Items: Recommendations for Interventional Trials (SPIRIT) guidelines (figure 1 and online supplemental file 1).<sup>34</sup>

### Patient and public involvement

Materials used to communicate details of the study with patients and family members were developed with input from the Vanderbilt Community Advisory Council. Study authors will disseminate the results of this study online and via social media in forms suitable for public understanding.

### Study design

The DEVICE trial is a pragmatic, multicentre, unblinded, parallel-group, randomised trial comparing the use of a video laryngoscope with the use of a direct laryngoscope for the first attempt at emergency tracheal intubation among critically ill adults in the ED and ICU. The primary outcome is successful intubation on the first attempt. An independent data and safety monitoring board (DSMB)

| TIMEPOINT                       | STUDY PERIOD           |                      |                 |    |                  |                   |                                       |
|---------------------------------|------------------------|----------------------|-----------------|----|------------------|-------------------|---------------------------------------|
|                                 | Eligibility Screen     | Randomize & Allocate | Peri-Procedural |    |                  |                   | Final Outcome Assessment              |
|                                 | Decision to perform TI | Prior to TI          | Induction       | TI | 0-2 min after TI | 0-48 hrs after TI | Discharge or 28 days after enrollment |
| ENROLLMENT:                     |                        |                      |                 |    |                  |                   |                                       |
| Eligibility Screen              | X                      |                      |                 |    |                  |                   |                                       |
| Allocation                      |                        | X                    |                 |    |                  |                   |                                       |
| INTERVENTIONS:                  |                        |                      |                 |    |                  |                   |                                       |
| Video Laryngoscope              |                        |                      |                 | X  |                  |                   |                                       |
| Direct Laryngoscope             |                        |                      |                 | X  |                  |                   |                                       |
| Screening for Contraindications | X                      | X                    | X               | X  |                  |                   |                                       |
| ASSESSMENTS:                    |                        |                      |                 |    |                  |                   |                                       |
| Baseline Variables              | X                      | X                    |                 |    |                  |                   |                                       |
| Peri-Procedural Variables       |                        | X                    | X               | X  | X                |                   |                                       |
| Clinical Outcomes               |                        |                      |                 |    |                  | X                 | X                                     |

**Figure 1** Schedule of enrolment, interventions and assessments in the DEVICE trial. DEVICE, DirEct versus Video LaryngosCopE; TI, tracheal intubation.

is monitoring the progress and safety of the trial. Study institutions and investigators are listed in the online supplemental file 2.

### Study population

The inclusion criteria for this study are:

1. Patient is located in a participating unit.
2. Planned procedure is orotracheal intubation using a laryngoscope.
3. Planned operator is a clinician expected to routinely perform tracheal intubation in the participating unit.

The exclusion criteria for the study are:

1. Patient is known to be less than 18 years old.
2. Patient is known to be pregnant.
3. Patient is known to be a prisoner.
4. Immediate need for tracheal intubation precludes safe performance of study procedures.
5. Operator has determined that the use of a video laryngoscope or use of a direct laryngoscope is required or contraindicated for the optimal care of the patient.

### Randomisation and treatment allocation

Patients are randomised in a 1:1 ratio to undergo intubation using a video laryngoscope or using a direct laryngoscope for the first attempt in permuted blocks of variable size, stratified by study site. Study group assignments are generated using a computerised randomisation sequence, placed in sequentially numbered opaque envelopes and distributed to enrolling sites. Before opening the envelope, the operator determines that the patient meets eligibility criteria, records the predicted difficulty of intubation ('easy', 'moderate' or 'difficult') and selects the blade shape the operator plans to use if the patient is

randomised to the video laryngoscope group ('hyperangulated' or 'non-hyperangulated/standard geometry'). The operator or delegate then opens the envelope. Patients are enrolled once the envelope is opened to reveal the study group assignment. After enrolment and randomisation, patients, treating clinicians and study personnel are not blinded to study group assignment.

### Study interventions

#### Video laryngoscope group

For patients assigned to the video laryngoscope group, operators are instructed to use a video laryngoscope on the first laryngoscopy attempt. A video laryngoscope is defined as a laryngoscope with a camera and a video screen. Trial protocol does not dictate the brand of video laryngoscope or the geometry of the laryngoscope blade (eg, hyperangulated vs non-hyperangulated), but these details will be recorded. Operators are encouraged, but not required, to view the video screen during laryngoscopy ('indirect laryngoscopy') and tracheal intubation.

#### Direct laryngoscope group

For patients assigned to the direct laryngoscope group, operators are instructed to use a direct laryngoscope on the first laryngoscopy attempt. A direct laryngoscope is defined as a laryngoscope without a camera and a video screen. Trial protocol does not dictate the brand of direct laryngoscope or the geometry of the laryngoscope blade (eg, curved (Macintosh) vs straight (Miller)), but these details will be recorded.

### Co-interventions and subsequent attempts at laryngoscopy and intubation

Study group assignment determines only the type of laryngoscope (video vs direct) used on the first laryngoscopy attempt. If determined to be required to ensure optimal care of the patient, treating clinicians may use any device at any time, regardless of study group assignment. Cases in which clinicians use a laryngoscope discordant with randomised assignment on the first intubation attempt will be documented and tracked. All aspects of the intubation procedure, except the type of laryngoscope used on the first attempt, are at the discretion of treating clinicians, including selection of sedative and neuromuscular blocking medications, patient positioning, approach to preoxygenation, use of a bougie or a stylet, and endotracheal tube size. Best practices in tracheal intubation will be encouraged according to clinical protocols at the study sites. The trial intervention ends after the first attempt at laryngoscopy. If the first attempt is unsuccessful, the operator may use any method of intubation on subsequent intubation attempts, including the use of a direct laryngoscope in the video laryngoscope group or use of a video laryngoscope in the direct laryngoscope group. The type of laryngoscope used during the initial and final laryngoscopy attempt will be collected and reported.

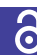

## Data collection

A trained observer, not directly involved with the intubation procedure, collects data for key periprocedural outcomes. These outcomes include successful intubation on the first attempt, time interval between laryngoscopy and successful intubation, the oxygen saturation (SpO<sub>2</sub>) and systolic blood pressure at induction, the lowest SpO<sub>2</sub> and systolic blood pressure between induction and 2 min after successful intubation, and new or increased vasopressor administration between induction and 2 min after successful intubation. Observers may be clinical personnel on the enrolling unit (eg, physician, nurse or pharmacist) or research study personnel.

Immediately following the intubation procedure, the operator completes a paper data collection form to record the approach to preoxygenation, oxygenation and ventilation between induction and laryngoscopy, the brand of laryngoscope used, the blade shape, the Cormack-Lehane grade of laryngeal view,<sup>35</sup> use of the video screen to visualise the larynx (if applicable), use of a bougie or a stylet, reasons for failure to intubate on the first attempt (if applicable), intubation approaches on subsequent attempts, difficult airway characteristics observed before or during the procedure (facial trauma, small mouth opening, limited neck mobility, cervical collar, large neck, obesity, fluids obscuring view of vocal cords, upper airway obstruction or oedema), and complications of intubation (witnessed pulmonary aspiration, oesophageal intubation, injury to airways, injury to teeth, cardiac arrest between induction and 2 min following intubation). The diagnosis of oesophageal intubation is made by the operator based on the presence of any clinical sign including visual inspection, capnography, or absence of breath sounds or chest rise. Operators also record their specialty, training level, and estimates of the number of previous intubations they have performed and the number of previous intubations they have performed using a direct laryngoscope.

Study personnel at each site review the medical record to collect data on baseline patient characteristics, pre-laryngoscopy and post-laryngoscopy management, and clinical outcomes at 28 days after enrolment.

The following variables are collected:

1. Baseline: age, sex, height, weight, race, ethnicity, Acute Physiology and Chronic Health Evaluation II score,<sup>36</sup> active medical problems at the time of enrolment, comorbidities, indication for intubation, vasopressor receipt in the hour prior to enrolment, highest fractional inspired oxygen (FIO<sub>2</sub>) in the hour prior to enrolment, lowest SpO<sub>2</sub>/FIO<sub>2</sub> (or arterial oxygen pressure/FIO<sub>2</sub>) ratio in the hour prior to enrolment, pre-procedural Glasgow Coma Scale score,<sup>37</sup> oxygen delivery device at enrolment, assessment of the likelihood of a difficult intubation, presence of difficult airway characteristics (limited mouth opening, small mandible, large tongue, short neck, large neck circumference, limited anatomical neck mobility, cervical immobilisation due

to trauma, obesity), operator's level of training and specialty, operator's prior intubation experience.

2. Periprocedural: lowest SpO<sub>2</sub> from enrolment to induction, approach to and duration of preoxygenation, time of sedative administration, sedative agent and dose administered, neuromuscular blocking agent and dose administered, SpO<sub>2</sub> and systolic blood pressure at the time of induction, approach to oxygen administration and ventilation between induction and the first attempt at laryngoscopy, time of start of first laryngoscopy attempt, laryngoscope used on first attempt (model, blade size, blade shape), use of video screen (if applicable) on the first laryngoscopy attempt, best Cormack-Lehane grade of view<sup>35</sup> on the first laryngoscopy attempt, presence of body fluid obstructing view of the larynx, presence of upper airway obstruction or oedema, number of intubation attempts (number of times the laryngoscope entered the mouth, number of times the bougie entered mouth (if applicable), number of times the endotracheal tube entered the mouth), reason for failure of the first intubation attempt (if applicable), procedural adjustments made for the final intubation attempt, oesophageal intubation, injury to teeth, operator-reported pulmonary aspiration between induction and intubation, time of successful tracheal intubation, endotracheal tube size, lowest SpO<sub>2</sub> from induction until 2 min after intubation, lowest systolic blood pressure from induction until 2 min after intubation, new or increased vasopressor administration from induction until 2 min after intubation, cardiac arrest from induction until 2 min after intubation not resulting in death within 1 hour of induction, cardiac arrest from induction until 2 min after intubation resulting in death within 1 hour of induction.
3. Twenty-four hours after enrolment: new pneumothorax detected in the first 24 hours after induction, vasopressor receipt at 24 hours after induction, SpO<sub>2</sub> at 24 hours after induction, FIO<sub>2</sub> at 24 hours after induction, positive end-expiratory pressure at 24 hours after induction, systolic blood pressure at 24 hours after induction.
4. In-hospital outcomes: ventilator-free days in the first 28 days, ICU-free days in the first 28 days and in-hospital mortality at 28 days. Definitions for ICU-free days and ventilator-free days are provided in the online supplemental files 3 and 4.

## Primary outcome

The primary outcome is successful intubation on the first attempt. Successful intubation on the first attempt is defined as placement of an endotracheal tube in the trachea following a single insertion of a laryngoscope blade into the mouth and *either* a single insertion of an endotracheal tube into the mouth *or* a single insertion of a bougie into the mouth followed by a single insertion of an endotracheal tube into the mouth.

Data for the assessment of the primary outcome are collected by a trained independent observer using a structured data collection form that records the number of insertions of the laryngoscope blade, bougie (if used) and endotracheal tube into the patient's mouth. In the event that data from the independent observer are missing, data from the operator's self-report of successful intubation on the first attempt will be used.

### Secondary outcome

The secondary outcome is the incidence of severe complications occurring between induction and 2 min following successful intubation. Severe complications are defined as one or more of the following:

- ▶ Severe hypoxaemia (lowest SpO<sub>2</sub> measured by pulse oximetry <80%).
- ▶ Severe hypotension (systolic blood pressure <65 mm Hg or new or increased vasopressor administration).
- ▶ Cardiac arrest not resulting in death.
- ▶ Cardiac arrest resulting in death.

Cardiac arrest will be considered to have resulted in death if a patient who experienced cardiac arrest between induction and 2 min after intubation died within the 1 hour following intubation.

### Exploratory outcomes

Exploratory procedural outcomes are as follows:

- ▶ Duration of laryngoscopy and tracheal intubation. This is defined as the interval (in seconds) between the first insertion of a laryngoscope blade into the mouth and the final placement of an endotracheal tube or tracheostomy tube in the trachea.
- ▶ Number of laryngoscopy attempts.
- ▶ Number of attempts to cannulate the trachea with a bougie or endotracheal tube.
- ▶ Successful intubation on the first attempt without a severe complication.
- ▶ Reasons for failure to intubate the trachea on the first attempt, which include:
  - Inadequate view of the larynx.
  - Inability to intubate the trachea with an endotracheal tube.
  - Inability to cannulate the trachea with a bougie.
  - Attempt aborted due to a change in patient condition (eg, worsened hypoxaemia, hypotension, bradycardia, vomiting, bleeding).
  - Technical failure of the laryngoscope (eg, battery, light source, camera, screen).
  - Other.

Exploratory safety outcomes are as follows:

- ▶ Oesophageal intubation.
- ▶ Injury to the teeth.
- ▶ Operator-reported aspiration.

Exploratory clinical outcomes are as follows:

- ▶ ICU-free days in the first 28 days.
- ▶ Ventilator-free days in the first 28 days.
- ▶ 28-day all-cause in-hospital mortality.

### Sample size estimation

The minimum clinically important difference in successful intubation on the first attempt that would be needed to justify routine use of a video laryngoscope rather than a direct laryngoscope in the ED and ICU is uncertain. The current trial is designed to detect a 5% absolute difference between groups in the incidence of successful intubation on the first attempt. An absolute difference of 5% in successful intubation on the first attempt is similar to or smaller than the difference used in the design of prior airway management trials and is considered by airway management experts to be clinically meaningful.<sup>21 28 38 39</sup>

Assuming (1) an incidence of successful intubation on the first attempt of 80% in the direct laryngoscope group, (2) 90% statistical power, (3) a two-sided alpha of 0.05 and (4) enrolment at 16 sites with an intracluster correlation for the primary outcome of 0.05, we calculated that detecting a 5% absolute increase in the incidence of successful intubation on the first attempt would require enrolment of 1920 patients (960 per group). Anticipating missing data for up to 4% of enrolled patients, we will plan to enrol a total of 2000 patients (1000 per group).

### DSMB and interim analysis

A DSMB composed of experts with backgrounds in emergency medicine, pulmonary and critical care medicine, anaesthesiology, bioethics and biostatistics has overseen the design of the trial and is monitoring its conduct. The DSMB will review a single interim analysis prepared by the study biostatistician at the anticipated halfway point of the trial, after enrolment of 1000 patients. The stopping boundary for efficacy was prespecified as a p value of 0.001 or less, using a X<sup>2</sup> test, for the difference in the incidence of the primary outcome between groups. This conservative Haybittle-Peto boundary was selected to allow the final analysis to be performed using an unchanged level of significance (p<0.05). The DSMB retains the authority to stop the trial at any point, request additional data or interim analyses, or request modifications of the study protocol to protect patient safety. Trial safety monitoring and handling of adverse events are described in detail in the online supplemental file 5. Patient privacy and data storage details are listed in the online supplemental file 6.

### Statistical analysis principles

Analyses will be conducted following reproducible research principles using R (R Foundation for Statistical Computing, Vienna, Austria).<sup>40</sup> We will present summary tabulations by treatment group. For categorical variables, the number and proportion of patients will be presented. For continuous variables, the mean and SD or median and IQR will be presented, as appropriate.

We will analyse a single prespecified primary outcome and a single prespecified secondary outcome using a X<sup>2</sup> test. Consistent with recommendations of the Food and Drug Administration<sup>41</sup> and the European Medicines Agency,<sup>42</sup> each will be tested using a two-sided p value with a significance level of 0.05 with contextual information provided



via effect size and 95% CIs. The primary analysis will occur in an intent-to-treat fashion among all patients randomised, excluding only those patients whose data were withdrawn from the study. For all other analyses except safety analyses, emphasis will be placed on the estimate of effect size with 95% CIs, as recommended by the International Committee of Medical Journal Editors,<sup>43</sup> and no corrections for multiple comparisons will be performed.

### Main analysis of the primary outcome

The main analysis will be an unadjusted, intention-to-treat comparison of successful intubation on the first attempt between patients randomised to the video laryngoscope group and patients randomised to the direct laryngoscope group, using a  $X^2$  test. The difference in proportions, the associated 95% CI and a *p* value for the primary outcome will be presented.

### Secondary analyses of the primary outcome

#### Multivariable modelling to account for covariates

To account for relevant covariates, we will develop a generalised linear mixed-effects model using a logit link function with the primary outcome as the dependent variable, study site as a random effect, and fixed effects of study group and the following prespecified baseline covariates: age, sex, body mass index, operator experience quantified as the operator's total number of prior intubations and location of intubation (ED vs ICU). All continuous variables will be modelled assuming a non-linear relationship to the outcome using restricted cubic splines with between 3 and 5 knots.

#### Effect modification

We will examine whether prespecified baseline variables modify the effect of study group assignment (video laryngoscope vs direct laryngoscope) on the primary outcome using a formal test of statistical interaction in a generalised linear mixed-effects model with the primary outcome as the dependent variable, study site as a random effect and fixed effects of study group, the prespecified proposed effect modifier and the interaction between the two. For categorical variables, we will present the OR and 95% CIs within each prespecified subgroup. Continuous variables will not be dichotomised for analysis of effect modification but may be dichotomised for data presentation. In accordance with the Instrument for assessing the Credibility of Effect Modification Analyses recommendations,<sup>44</sup> we have prespecified the following limited number of baseline variables as potential effect modifiers and the hypothesised direction of effect modification for each:

1. Patient location (ED vs ICU). We hypothesise that patient location will not modify the effect of study group assignment on the primary outcome.
2. Traumatic injury (yes vs no). We hypothesise that traumatic injury will modify the effect of study group assignment on the primary outcome, with a greater increase in the incidence of successful intubation on the first attempt with the use of a video laryngoscope compared with a direct laryngoscope among patients

with traumatic injury compared with patients without traumatic injury.

3. Body mass index ( $\text{kg}/\text{m}^2$ ). We hypothesise that body mass index will modify the effect of study group assignment on the primary outcome, with a greater increase in the incidence of successful intubation on the first attempt with the use of a video laryngoscope compared with a direct laryngoscope among patients with higher body mass index as compared with patients with lower body mass index. This hypothesis of effect modification is supported by a non-significant trend toward effect modification in a meta-analysis of multiple prior randomised trials.<sup>9</sup>
4. Operator's pre-enrolment assessment of the anticipated difficulty of intubation (easy; moderate; difficult; not recorded). We hypothesise that the operator's pre-enrolment assessment will modify the effect of study group assignment on the primary outcome, with a greater increase in the incidence of successful intubation on the first attempt with the use of a video laryngoscope compared with a direct laryngoscope among patients assessed as difficult or moderate compared with easy. This hypothesis of effect modification is supported by significant effect modification in a meta-analysis of multiple prior randomised trials.<sup>9</sup>
5. Operator experience at the time of enrolment.
  - Total number of previous intubations performed by operator. We hypothesise that the total number of previous intubations performed by the operator will modify the effect of study group assignment on the primary outcome, with a greater increase in the incidence of successful intubation on the first attempt with the use of a video laryngoscope compared with a direct laryngoscope among operators with fewer previous intubations compared with operators with a greater number of previous intubations. This hypothesis of effect modification is supported by significant effect modification observed in a prior randomised trial among critically ill adults, but differs from a meta-analysis including trials of intubation in the operating room that did not observe effect modification based on the operator's prior experience.<sup>9,28</sup>
  - Proportion of previous intubations performed by the operator using a direct laryngoscope. We hypothesise that the proportion of previous intubations performed by the operator using a direct laryngoscope will modify the effect of study group assignment on the primary outcome, with a greater increase in the incidence of successful intubation on the first attempt with the use of a video laryngoscope compared with a direct laryngoscope among operators with a lower proportion of previous intubations performed by the operator using a direct laryngoscope compared with operators with a higher proportion of previous intubations performed by the operator using a direct laryngoscope.

We will also perform an effect modification analysis for the primary outcome that includes a three-way interaction between study group, total number of previous intubations performed by the operator and proportion of previous intubations performed by the operator using a direct laryngoscope.

### Sensitivity analyses of the primary outcome

We will assess the robustness of the findings of the primary analysis in a number of sensitivity analyses. First, because operators may choose to deviate from the assigned laryngoscope for the safety of the patient, we will repeat the primary analysis, but will consider patients for whom the operator crossed over on the first attempt from the assigned laryngoscope type to the non-assigned laryngoscope type not to have experienced successful intubation on the first attempt. Second, we will repeat the primary analysis among only patients for whom data on the primary outcome from the independent observer are available (ie, excluding cases in which operator self-report was the sole source of information for the primary outcome). Third, because the operator's prior experience with each type of laryngoscope may affect the likelihood of success with a video laryngoscope compared with a direct laryngoscope, we will repeat the primary analysis among only cases in which the proportion of prior intubations the operator has performed using a direct laryngoscope is between 0.25 and 0.75.

### Analysis of the secondary outcome

For the secondary outcome, severe complications occurring between induction and 2min following intubation, we will perform an unadjusted, intention-to-treat comparison of patients randomised to the video laryngoscope group versus patients randomised to the direct laryngoscope group, using a  $X^2$  test.

### Analyses of exploratory outcomes

For all prespecified exploratory outcomes, we will conduct unadjusted, intention-to-treat analyses comparing patients randomised to the video laryngoscope group versus patients randomised to the direct laryngoscope group. We will calculate absolute risk differences or differences in medians between groups with the associated 95% CIs.

### Handling of missing data

We anticipate that no data on the primary outcome will be missing. When data are missing for the secondary or exploratory outcomes, we will perform complete case analysis, excluding cases where the data for the analysed outcome are missing. There will be no imputation of missing data for these outcomes. In adjusted analyses, missing data for covariates will be imputed using multiple imputations.

### Trial status

The DEVICE trial is a prospective, multicentre, non-blinded randomised clinical trial comparing the use of a video laryngoscope with the use of a direct laryngoscope for the first

attempt at tracheal intubation of critically ill adults in the ED and ICU. Patient enrolment began on 19 March 2022 and is being conducted in 7 EDs and 10 ICUs in the USA.

## ETHICS AND DISSEMINATION

### Waiver of informed consent

Critically ill patients undergoing tracheal intubation in the ED or ICU are at significant risk of morbidity and mortality from their underlying illness. Most patients undergoing tracheal intubation in routine clinical care are intubated using either a video laryngoscope or a direct laryngoscope on the first attempt. Any benefits or risks of these two approaches are experienced by patients undergoing tracheal intubation in clinical care, outside the context of research. As a requirement for enrolment in the DEVICE trial, the patient's treating clinician must believe that either a video laryngoscope or a direct laryngoscope would be a safe and reasonable approach for the patient (otherwise the patient is excluded). Therefore, making the decision between the two approaches randomly (by study group assignment) rather than by a clinician who thinks either approach is safe and reasonable for the patient is expected to pose no more than minimal additional risk.

Obtaining informed consent for participation in the study would be impracticable. The majority of patients undergoing emergency tracheal intubation lack decisional capacity due to their underlying critical illness and surrogate decision-makers are frequently absent. Further, emergency tracheal intubation is a time-sensitive procedure with only minutes between the decision to perform intubation and the completion of the procedure. Meaningful informed consent could not be executed in this brief window and attempting to obtain informed consent would lead to potentially deleterious and unethical delays in intubation which would increase the risk of hypoxaemia, hypotension and periprocedural cardiac arrest.

Because the study involves minimal incremental risk, the study would not adversely affect the welfare or privacy rights of the participant and obtaining informed consent would be impracticable, a waiver of informed consent was requested from and approved by the single institutional review board (IRB) at Vanderbilt University Medical Center (reference number 211272). This is consistent with previous randomised trials comparing alternative approaches with tracheal intubation commonly used in clinical care.<sup>28 38 39 45-50</sup> This approach was approved by the US Department of Defense Defense Health Agency Human Research Protection Office (EIRB# 944893). IRBs at participating sites reviewed the protocol, addressed any local contextual factors with the site principal investigator, and ceded responsibility for ethics approval and study oversight to the single IRB.

### Information for patients and families

Information regarding the study is made available to patients and families using a patient and family information sheet. The patient and family information sheet contains



information on the purpose of the trial, study procedures, risks and discomforts, benefits, use of protected health information, confidentiality and investigator contact information. The Defense Health Agency Human Research Protection Office determined that this procedure meets the requirements of 32 CFR 219 and DODI 3216.02\_AF140-402. At centres with a significant population of non-English-speaking patients, the patient and family information sheet has been translated into Spanish and Somali languages and is made available to those patients.

### Protocol changes

Any further amendments to the protocol will be recorded on ClinicalTrials.gov as per SPIRIT guidelines. See the online supplemental file 7 for details on how protocol changes will be handled.

### Dissemination plan

Trial results will be submitted to a peer-reviewed journal and will be presented at one or more scientific conferences.

### Author affiliations

<sup>1</sup>Department of Emergency Medicine, Hennepin County Medical Center, Minneapolis, Minnesota, USA

<sup>2</sup>Department of Medicine, Division of Pulmonary, Allergy, and Critical Care Medicine, Hennepin County Medical Center, Minneapolis, Minnesota, USA

<sup>3</sup>Department of Emergency Medicine, Denver Health Medical Center, Denver, Colorado, USA

<sup>4</sup>Department of Emergency Medicine, University of Colorado Denver School of Medicine, Aurora, Colorado, USA

<sup>5</sup>Division of Pulmonary, Allergy, and Critical Care Medicine, Vanderbilt University Medical Center, Nashville, Tennessee, USA

<sup>6</sup>Pulmonary Section, Birmingham Veterans Affairs Medical Center, Birmingham, Alabama, USA

<sup>7</sup>Department of Medicine, Division of Pulmonary, Allergy, and Critical Care Medicine, University of Alabama at Birmingham, Birmingham, Alabama, USA

<sup>8</sup>Department of Emergency Medicine, Atrium Health Wake Forest Baptist, Winston-Salem, North Carolina, USA

<sup>9</sup>Department of Anesthesiology, Section on Critical Care, Atrium Health Wake Forest Baptist, Winston-Salem, North Carolina, USA

<sup>10</sup>Department of Medicine, Section of Pulmonary, Critical Care, Allergy and Immunology, Wake Forest School of Medicine, Winston-Salem, North Carolina, USA

<sup>11</sup>Department of Emergency Medicine, University of Washington Harborview Medical Center, Seattle, Washington, USA

<sup>12</sup>Department of Emergency Medicine, University of Alabama at Birmingham, Birmingham, Alabama, USA

<sup>13</sup>Department of Medicine, Division of Pulmonary Disease and Critical Care Medicine, Baylor Scott & White Medical Center, Temple, Texas, USA

<sup>14</sup>Department of Pulmonary and Critical Care Medicine, Ochsner Health, New Orleans, Louisiana, USA

<sup>15</sup>Department of Anesthesiology, Division of Anesthesia Critical Care Medicine, Vanderbilt University Medical Center, Nashville, Tennessee, USA

<sup>16</sup>Division of Pulmonary and Critical Care Medicine, Denver Health Medical Center, Denver, Colorado, USA

<sup>17</sup>Department of Medicine, Division of Pulmonary and Critical Care Medicine, University of Colorado School of Medicine, Aurora, Colorado, USA

<sup>18</sup>Department of Anesthesiology and Critical Care Medicine, University of Washington Harborview Medical Center, Seattle, Washington, USA

<sup>19</sup>Department of Anesthesiology, Duke University School of Medicine, Durham, North Carolina, USA

<sup>20</sup>Department of Emergency Medicine, Vanderbilt University Medical Center, Nashville, Tennessee, USA

<sup>21</sup>US Army Institute of Surgical Research, Fort Sam Houston, Texas, USA

<sup>22</sup>59th Medical Wing, Joint Base San Antonio-Lackland, Texas, USA

<sup>23</sup>Department of Biostatistics, Vanderbilt University Medical Center, Nashville, Tennessee, USA

<sup>24</sup>Vanderbilt Institute for Clinical and Translational Research, Vanderbilt University Medical Center, Nashville, Tennessee, USA

<sup>25</sup>Department of Medicine, Section of Pulmonary/Critical Care Medicine and Allergy/Immunology, University Medical Center New Orleans, New Orleans, Louisiana, USA

**Twitter** Stacy A Trent @drstrent, Sheetal Gandotra @SGandotraMD, Andrew Latimer @alatimer13 and Bradley Daniel Lloyd @BradLloydVFL

**Contributors** Study concept and design—MEP, BED, SAT, SGS, BJJ, DJ, WHS, TWR, AAG, JDC and MWS. Acquisition of data—MEP, BED, SAT, DR-A, KS, DWR, SG, JPG, KWG, AL, MRW, SG, DJV, JPW, SJH, ISD, CRB, VK, JJB, BDL, SWR, JAP, SM, DBP, HDW, AE, CH, AMJ, JTH, AAG, JDC and MWS. Drafting of the manuscript and study supervision—MEP, BED, SAT, JDC and MWS. Approval of the final version of this manuscript and critical revision of the manuscript for important intellectual content—MEP, BED, SAT, DR-A, KS, DWR, SG, JPG, KWG, AL, MRW, SG, DJV, JPW, SJH, ISD, CRB, VK, JJB, BDL, SWR, JAP, SM, DBP, HDW, AE, CH, AMJ, JTH, SGS, BJJ, BI, LW, JPR, KNW, DJ, WHS, TWR, AAG, JDC and MWS.

**Funding** The research was funded in part by the US Department of Defense, Defense Health Agency, J9 Office, RESTORAL programme. Data collection used the Research Electronic Data Capture (REDCap) tool developed and maintained with Vanderbilt Institute for Clinical and Translational Research grant support (UL1 TR000445 from NCATS/NIH).

**Disclaimer** The funding institutions had no role in (1) conception, design or conduct of the study; (2) collection, management, analysis, interpretation or presentation of the data; or (3) preparation, review or approval of the manuscript. The views expressed are those of the authors and do not reflect the official views or policy of the Department of Defense or its components.

**Competing interests** MWS was supported by the National Heart, Lung and Blood Institute (K23HL143053). JDC was supported by the National Heart, Lung and Blood Institute (K23HL153584-01). JPG received support from the CHEST Foundation for instruction and travel. TWR was supported in part by the National Institutes of Health and received consulting payments from Cumberland Pharmaceuticals and Cytovalle, and served on a data safety and monitoring board for Sanofi.

**Patient and public involvement** Patients and/or the public were involved in the design, or conduct, or reporting, or dissemination plans of this research. Refer to the Methods section for further details.

**Patient consent for publication** Not required.

**Provenance and peer review** Not commissioned; externally peer reviewed.

**Supplemental material** This content has been supplied by the author(s). It has not been vetted by BMJ Publishing Group Limited (BMJ) and may not have been peer-reviewed. Any opinions or recommendations discussed are solely those of the author(s) and are not endorsed by BMJ. BMJ disclaims all liability and responsibility arising from any reliance placed on the content. Where the content includes any translated material, BMJ does not warrant the accuracy and reliability of the translations (including but not limited to local regulations, clinical guidelines, terminology, drug names and drug dosages), and is not responsible for any error and/or omissions arising from translation and adaptation or otherwise.

**Open access** This is an open access article distributed in accordance with the Creative Commons Attribution Non Commercial (CC BY-NC 4.0) license, which permits others to distribute, remix, adapt, build upon this work non-commercially, and license their derivative works on different terms, provided the original work is properly cited, appropriate credit is given, any changes made indicated, and the use is non-commercial. See: <http://creativecommons.org/licenses/by-nc/4.0/>.

### ORCID iDs

Matthew E Prekker <http://orcid.org/0000-0002-3969-3022>

Stacy A Trent <http://orcid.org/0000-0001-9384-7400>

Derek W Russell <http://orcid.org/0000-0002-2716-1344>

Sheetal Gandotra <http://orcid.org/0000-0002-5475-9704>

J Taylor Herbert <http://orcid.org/0000-0002-9077-2391>

Matthew W Semler <http://orcid.org/0000-0002-7664-8263>

### REFERENCES

- 1 Sakles JC, Chiu S, Mosier J, *et al*. The importance of first pass success when performing Orotracheal intubation in the emergency department. *Acad Emerg Med* 2013;20:71–8.
- 2 Russotto V, Myatra SN, Laffey JG, *et al*. Intubation practices and adverse Peri-intubation events in critically ill patients from 29 countries. *JAMA* 2021;325:1164–72.

- 3 Janeway HH. Intra-tracheal anesthesia from the standpoint of the nose, throat and oral surgeon with a description of a new instrument for catheterizing the trachea. *Laryngoscope* 1913;23:1082.
- 4 Miller RA. A new laryngoscope. *Anesthesiology* 1941;2:317–20.
- 5 Macintosh RR. A new laryngoscope. *The Lancet* 1943;241:205.
- 6 Kaplan MB, Ward DS, Berci G. A new video laryngoscope—an aid to intubation and teaching. *J Clin Anesth* 2002;14:620–6.
- 7 Cooper RM, Pacey JA, Bishop MJ, et al. Early clinical experience with a new videolaryngoscope (GlideScope) in 728 patients. *Can J Anaesth* 2005;52:191–8.
- 8 Berkow LC, Morey TE, Urdaneta F. The technology of video laryngoscopy. *Anesth Analg* 2018;126:1527–34.
- 9 Hansel J, Rogers AM, Lewis SR, et al. Videolaryngoscopy versus direct laryngoscopy for adults undergoing tracheal intubation. *Cochrane Database Syst Rev* 2022;4:CD011136.
- 10 Cook TM, Woodall N, Harper J, et al. Major complications of airway management in the UK: results of the fourth national audit project of the Royal College of anaesthetists and the difficult airway Society. Part 2: intensive care and emergency departments. *Br J Anaesth* 2011;106:632–42.
- 11 Karamchandani K, Wheelwright J, Yang AL, et al. Emergency airway management outside the operating room: current evidence and management strategies. *Anesth Analg* 2021;133:648–62.
- 12 Monette DL, Brown CA, Benoit JL, et al. The impact of video laryngoscopy on the clinical learning environment of emergency medicine residents: a report of 14,313 Intubations. *AEM Educ Train* 2019;3:156–62.
- 13 Trimmel H, Kreutziger J, Fertsak G, et al. Use of the Airtraq laryngoscope for emergency intubation in the prehospital setting: a randomized control trial. *Crit Care Med* 2011;39:489–93.
- 14 Arima T, Nagata O, Miura T, et al. Comparative analysis of airway scope and MacIntosh laryngoscope for intubation primarily for cardiac arrest in prehospital setting. *Am J Emerg Med* 2014;32:40–3.
- 15 Trimmel H, Kreutziger J, Fitzka R, et al. Use of the GlideScope ranger video laryngoscope for emergency intubation in the prehospital setting: a randomized control trial. *Crit Care Med* 2016;44:e470–6.
- 16 Ducharme S, Kramer B, Gelbart D, et al. A pilot, prospective, randomized trial of video versus direct laryngoscopy for paramedic endotracheal intubation. *Resuscitation* 2017;114:121–6.
- 17 Kreutziger J, Hornung S, Harrer C, et al. Comparing the McGrath MAC video laryngoscope and direct laryngoscopy for prehospital emergency intubation in air rescue patients: a multicenter, randomized, controlled trial. *Crit Care Med* 2019;47:1362–70.
- 18 Macke C, Gralla F, Winkelmann M, et al. Increased first pass success with C-MAC Videolaryngoscopy in prehospital endotracheal Intubation—A randomized controlled trial. *J Clin Med* 2020;9:2719.
- 19 Yeatts DJ, Dutton RP, Hu PF, et al. Effect of video laryngoscopy on trauma patient survival: a randomized controlled trial. *J Trauma Acute Care Surg* 2013;75:212–9.
- 20 Ahmadi K, Ebrahimi M, Hashemian AM, et al. GlideScope video laryngoscope for difficult intubation in emergency patients: a quasi-randomized controlled trial. *Acta Med Iran* 2015;53:738–42.
- 21 Driver BE, Prekker ME, Moore JC, et al. Direct versus video laryngoscopy using the C-MAC for tracheal intubation in the emergency department, a randomized controlled trial. *Acad Emerg Med* 2016;23:433–9.
- 22 Goksu E, Kilic T, Yildiz G, et al. Comparison of the C-MAC video laryngoscope to the MacIntosh laryngoscope for intubation of blunt trauma patients in the ED. *Turk J Emerg Med* 2016;16:53–6.
- 23 Kim JW, Park SO, Lee KR, et al. Video laryngoscopy vs. direct laryngoscopy: which should be chosen for endotracheal intubation during cardiopulmonary resuscitation? A prospective randomized controlled study of experienced intubators. *Resuscitation* 2016;105:196–202.
- 24 Sulser S, Uebmann D, Schlaepfer M, et al. C-MAC videolaryngoscope compared with direct laryngoscopy for rapid sequence intubation in an emergency department: a randomised clinical trial. *Eur J Anaesthesiol* 2016;33:943–8.
- 25 Sanguanwit P, Yuksen C, Laowattana N. Direct versus video laryngoscopy in emergency intubation: a randomized control trial study. *Bull Emerg Trauma* 2021;9:118–24.
- 26 Griesdale DEG, Chau A, Isaac G, et al. Video-laryngoscopy versus direct laryngoscopy in critically ill patients: a pilot randomized trial. *Can J Anaesth* 2012;59:1032–9.
- 27 Silverberg MJ, Li N, Acquah SO, et al. Comparison of video laryngoscopy versus direct laryngoscopy during urgent endotracheal intubation: a randomized controlled trial. *Crit Care Med* 2015;43:636–41.
- 28 Janz DR, Semler MW, Lentz RJ, et al. Randomized trial of video laryngoscopy for endotracheal intubation of critically ill adults. *Crit Care Med* 2016;44:1980–7.
- 29 Abdelgalel EF, Mowafy SMS. Comparison between Glidescope, Airtraq and MacIntosh laryngoscopy for emergency endotracheal intubation in intensive care unit: randomized controlled trial. *Egypt J Anaesth* 2018;34:123–8.
- 30 Gao Y-X, Song Y-B, Gu Z-J, et al. Video versus direct laryngoscopy on successful first-pass endotracheal intubation in ICU patients. *World J Emerg Med* 2018;9:99–104.
- 31 Dey S, Pradhan D, Saikia P, et al. Intubation in the intensive care unit: C-MAC video laryngoscope versus MacIntosh laryngoscope. *Med Intensiva* 2020;44:135–41.
- 32 Dharanindra. A comparative study of King vision video laryngoscope and MacIntosh laryngoscope for intubation in the ICU. *Indian J Crit Care Med* 2020;24 Suppl:S38–9.
- 33 Lascarrou JB, Boisrame-Helms J, Bailly A, et al. Video laryngoscopy vs direct laryngoscopy on successful first-pass Orotracheal intubation among ICU patients: a randomized clinical trial. *JAMA* 2017;317:483–93.
- 34 Chan A-W, Tetzlaff JM, Gøtzsche PC, et al. Spirit 2013 explanation and elaboration: guidance for protocols of clinical trials. *BMJ* 2013;346:e7586.
- 35 Cormack RS, Lehane J. Difficult tracheal intubation in obstetrics. *Anaesthesia* 1984;39:1105–11.
- 36 Knaus WA, Draper EA, Wagner DP, et al. Apache II: a severity of disease classification system. *Crit Care Med* 1985;13:818–29.
- 37 Teasdale G, Jennett B. Assessment of coma and impaired consciousness. A practical scale. *Lancet* 1974;2:81–4.
- 38 Driver BE, Prekker ME, Klein LR, et al. Effect of use of a Bougie vs endotracheal tube and Stylet on First-Attempt intubation success among patients with difficult airways undergoing emergency intubation: a randomized clinical trial. *JAMA* 2018;319:2179–89.
- 39 Driver BE, Semler MW, Self WH, et al. Effect of use of a Bougie vs endotracheal tube with stylet on successful intubation on the first attempt among critically ill patients undergoing tracheal intubation: a randomized clinical trial. *JAMA* 2021;326:2488–97.
- 40 RStudio Team. RStudio: Integrated Development for R [Internet], 2015. Available: <http://www.rstudio.com>
- 41 Food and Drug Administration. E9 Statistical Principles for Clinical Trials [Internet]. Available: <https://www.fda.gov/media/71336/download> [Accessed 09 Jun 2021].
- 42 European Medicines Agency. Statistical Principles for Clinical Trials [Internet]. Available: [https://www.ema.europa.eu/en/documents/scientific-guideline/ich-e-9-statistical-principles-clinical-trials-step-5\\_en.pdf](https://www.ema.europa.eu/en/documents/scientific-guideline/ich-e-9-statistical-principles-clinical-trials-step-5_en.pdf) [Accessed 09 Jun 2021].
- 43 International Committee of Medical Journal Editors. Recommendations for the Conduct, Reporting, Editing, and Publication of Scholarly Work in Medical Journals [Internet]. Available: <http://www.icmje.org/icmje-recommendations.pdf> [Accessed 09 Jun 2021].
- 44 Schandelmaier S, Briel M, Varadhan R, et al. Development of the instrument to assess the credibility of effect modification analyses (ICEMAN) in randomized controlled trials and meta-analyses. *CMAJ* 2020;192:E901–6.
- 45 Janz DR, Semler MW, Joffe AM, et al. A multicenter randomized trial of a checklist for endotracheal intubation of critically ill adults. *Chest* 2018;153:816–24.
- 46 Semler MW, Janz DR, Lentz RJ, et al. Randomized trial of apneic oxygenation during endotracheal intubation of the critically ill. *Am J Respir Crit Care Med* 2016;193:273–80.
- 47 Casey JD, Janz DR, Russell DW, et al. Bag-Mask ventilation during tracheal intubation of critically ill adults. *N Engl J Med* 2019;380:811–21.
- 48 Janz DR, Casey JD, Semler MW, et al. Effect of a fluid bolus on cardiovascular collapse among critically ill adults undergoing tracheal intubation (prepare): a randomised controlled trial. *Lancet Respir Med* 2019;7:1039–47.
- 49 Semler MW, Janz DR, Russell DW, et al. A Multicenter, Randomized Trial of Ramped Position vs Sniffing Position During Endotracheal Intubation of Critically Ill Adults. *Chest* 2017;152:712–22.
- 50 Russell DW, Casey JD, Gibbs KW, et al. Effect of fluid bolus administration on cardiovascular collapse among critically ill patients undergoing tracheal intubation: a randomized clinical trial. *JAMA* 2022;328:270–9.



## DEVICE Trial Statistical Analysis Plan Revision Sequence

October 10, 2022 Statistical Analysis Plan submitted for publication

November 8, 2022 Statistical Analysis Plan published on preprint server

November 17, 2021 Final patient enrolled

December 23, 2022 Statistical Analysis Plan completed peer review

January 13, 2023 Statistical Analysis Plan\* published:

Prekker ME, Driver BE, Trent SA, Resnick-Ault D, Seitz K, Russell DW, Gandotra S, Gaillard JP, Gibbs KW, Latimer A, Whitson MR, Ghamande S, Vonderhaar DJ, Walco JP, Hansen SJ, Douglas IS, Barnes CR, Krishnamoorthy V, Bastman JJ, Lloyd BD, Robison SW, Palakshappa JA, Mitchell S, Page DB, White HD, Espinera A, Hughes C, Joffe AM, Herbert JT, Schauer SG, Long BJ, Imhoff B, Wang L, Rhoads JP, Womack KN, Janz D, Self WH, Rice TW, Ginde AA, Casey JD, Semler MW for the DEVICE investigators and the Pragmatic Critical Care Research Group. DirEct versus VIdeo LaryngosCopE (DEVICE): protocol and statistical analysis plan for a randomised clinical trial in critically ill adults undergoing emergency tracheal intubation. *BMJ Open*. 2023 Jan 13;13(1):e068978. PMID: 36639210

*\*No changes to content of the statistical analysis plan occurred between submission of the Protocol and Statistical Analysis Plan and its publication.*
